1 **Prioritization of genes driving congenital phenotypes of patients with *de novo* genomic**  
2 **structural variants**

3 *Sjors Middelkamp*<sup>1,†</sup>, *Judith M. Vlaar*<sup>1,†</sup>, *Jacques Giltay*<sup>2</sup>, *Jerome Korzelius*<sup>1,3</sup>, *Nicolle*  
4 *Besselink*<sup>1</sup>, *Sander Boymans*<sup>1</sup>, *Roel Janssen*<sup>1</sup>, *Lisanne de la Fonteijne*<sup>1</sup>, *Ellen van*  
5 *Binsbergen*<sup>2</sup>, *Markus J. van Roosmalen*<sup>1</sup>, *Ron Hochstenbach*<sup>2</sup>, *Daniela Giachino*<sup>5</sup>, *Michael E.*  
6 *Talkowski*<sup>6,7,8</sup>, *Wigard P. Kloosterman*<sup>2</sup>, *Edwin Cuppen*<sup>1,\*</sup>

7

8 <sup>1</sup>Center for Molecular Medicine and OncoCode Institute, University Medical Center Utrecht,  
9 Utrecht 3584 CX, the Netherlands

10 <sup>2</sup>Department of Genetics, University Medical Center Utrecht, Utrecht 3584 EA, the  
11 Netherlands

12 <sup>3</sup>Max Planck Institute for Biology of Aging, Cologne, Germany

13 <sup>5</sup>Medical Genetics Unit, Department of Clinical and Biological Sciences, University of Torino,  
14 Orbassano 10043, Italy.

15 <sup>6</sup>Molecular Neurogenetics Unit, Center for Human Genetic Research, Department of  
16 Neurology, Massachusetts General Hospital, Boston, Massachusetts, USA.

17 <sup>7</sup>Psychiatric and Neurodevelopmental Genetics Unit, Center for Human Genetic Research,  
18 Department of Neurology, Massachusetts General Hospital and Harvard Medical School,  
19 Boston, Massachusetts, USA.

20 <sup>8</sup>Program in Medical and Population Genetics, Broad Institute of MIT and Harvard, Cambridge,  
21 Massachusetts, USA

22 † These authors contributed equally to this work

23 \*Correspondence [ecuppen@umcutrecht.nl](mailto:ecuppen@umcutrecht.nl)

24

25 **Abstract**

26 **Background:** Genomic structural variants (SVs) can affect many genes and regulatory  
27 elements. Therefore, the molecular mechanisms driving the phenotypes of patients with  
28 multiple congenital abnormalities and/or intellectual disability carrying *de novo* SVs are  
29 frequently unknown.

30 **Results:** We applied a combination of systematic experimental and bioinformatic methods to  
31 improve the molecular diagnosis of 39 patients with *de novo* SVs and an inconclusive  
32 diagnosis after regular genetic testing. In seven of these cases (18%) whole genome  
33 sequencing analysis detected disease-relevant complexities of the SVs missed in routine  
34 microarray-based analyses. We developed a computational tool to predict effects on genes  
35 directly affected by SVs and on genes indirectly affected due to changes in chromatin  
36 organization and impact on regulatory mechanisms. By combining these functional predictions  
37 with extensive phenotype information, candidate driver genes were identified in 16/39 (41%)  
38 patients. In eight cases evidence was found for involvement of multiple candidate drivers  
39 contributing to different parts of the phenotypes. Subsequently, we applied this computational  
40 method to a collection of 382 patients with previously detected and classified *de novo* SVs  
41 and identified candidate driver genes in 210 cases (54%), including 32 cases whose SVs were  
42 previously not classified as pathogenic. Pathogenic positional effects were predicted in 25%  
43 of the cases with balanced SVs and in 8% of the cases with copy number variants.

44 **Conclusions:** These results show that driver gene prioritization based on integrative analysis  
45 of WGS data with phenotype association and chromatin organization datasets can improve  
46 the molecular diagnosis of patients with *de novo* SVs.

47

48 **Keywords:** Structural variation, Copy number variants, Neurodevelopmental disorders,  
49 Intellectual disability, Multiple congenital anomalies, Driver genes, Whole genome  
50 sequencing, Transcriptome sequencing, Topologically associated domains, Positional effects

51

52 **Background**

53 *De novo* germline structural variations (SVs) including deletions, duplications, inversions,  
54 insertions and translocations are important causes of (neuro-)developmental disorders such  
55 as intellectual disability and autism [1,2]. Clinical genetic centers routinely use microarrays  
56 and sometimes karyotyping to detect SVs at kilo- to mega base resolution [3]. The  
57 pathogenicity of an SV is generally determined by finding overlap with SVs in other patients  
58 with similar phenotypes [4,5]. SVs can affect large genomic regions which can contain many  
59 genes and non-coding regulatory elements [1]. This makes it challenging to determine which  
60 and how specific affected gene(s) and regulatory elements contributed to the phenotype of a  
61 patient. Therefore, the causative genes driving the phenotype are frequently unknown for  
62 patients with *de novo* SVs which can hamper conclusive genetic diagnosis.

63 SVs can have a direct effect on the expression and functioning of genes by altering  
64 their copy number or by truncating their coding sequences [1]. In addition, SVs can also  
65 indirectly influence the expression of adjacent genes by disrupting the interactions between  
66 genes and their regulatory elements [6]. New developments in chromatin conformation capture  
67 (3C) based technologies such as Hi-C have provided the means to study these indirect,  
68 positional effects [7]. Most of the genomic interactions (loops) between genes and enhancers  
69 occur within megabase-sized topologically associated domains (TADs). These domains are  
70 separated from each other by boundary elements characterized by CTCF-binding, which limit  
71 interactions between genes and enhancers that are not located within the same TAD [8,9].  
72 For several loci, such as the *EPHA4* [10], *SOX9* [11], *IHH* [12], *Pitx* [13] loci, it has been  
73 demonstrated that disruption of TAD boundaries by SVs can cause rewiring of genomic  
74 interactions between genes and enhancers, which can lead to altered gene expression during  
75 embryonic development and ultimately in disease phenotypes [14]. Although the organization  
76 of TADs appears to be stable across cell types, sub-TAD genomic interactions between genes  
77 and regulatory elements have been shown to be relatively dynamic and cell type-specific [15].  
78 Disruptions of genomic interactions are therefore optimally studied in disease-relevant cell  
79 types, which may be obtained from mouse models or from patient-derived induced pluripotent  
80 stem cells. However, it is not feasible to study each individual locus or patient with such

81 elaborate approaches and disease-relevant tissues derived from patients are usually not  
82 available. Therefore, it is not yet precisely known how frequently positional effects contribute  
83 to the phenotypes of patients with developmental disorders.

84 It has been shown that the use of computational methods based on combining  
85 phenotypic information from the Human Phenotype Ontology (HPO) database  
86 (“phenomatching”) with previously published chromatin interactions datasets can improve the  
87 interpretation of the molecular consequences of *de novo* SVs [16–18]. These approaches  
88 have largely been based on data derived from a small set of cell types and techniques. Here,  
89 we further expand these *in silico* approaches by integrating detailed phenotype information  
90 with genome-wide chromatin conformation datasets of many different cell types. By combining  
91 this method with whole genome and transcriptome sequencing we predicted which genes are  
92 affected by the SVs and which of these genes have likely been involved in the development  
93 of the disease phenotype (e.g. candidate driver genes). Accurate characterization of the  
94 effects of SVs on genes can be beneficial for the prediction of potential clinical relevance of  
95 the SVs. Detailed interpretation of the molecular effects of the SVs helped to identify candidate  
96 driver genes in 16 out of 39 included patients who had an inconclusive diagnosis after regular  
97 genetic testing. By applying the computational method on larger cohorts of patients with *de*  
98 *nov*o SVs we estimated the contribution of positional effects for both balanced and unbalanced  
99 SVs.

100

## 101 **Results**

### 102 **WGS reveals hidden complexity of *de novo* SVs**

103 We aimed to improve the genetic diagnosis of 39 individuals with multiple congenital  
104 abnormalities and/or intellectual disability (MCA/ID) who had an inconclusive diagnosis after  
105 regular genetic testing or who have complex genomic rearrangements. The phenotypes of the  
106 individuals were systematically described by Human Phenotype Ontology (HPO) terms [19–  
107 21]. The included individuals displayed a wide range of phenotypic features and most  
108 individuals (82%) presented neurological abnormalities including intellectual disability (Fig. 1a,

109 Additional File 2: Table S1). The parents of each of the patients were healthy, suggesting a  
110 *de novo* or recessive origin of the disease phenotypes. All individuals carried *de novo* SVs  
111 which were previously detected by ArrayCGH, SNP arrays, karyotyping or long-insert mate-  
112 pair sequencing (Additional File 1: Fig. S1a). First, we performed whole genome sequencing  
113 (WGS) for all individuals in the cohort to screen for potential pathogenic genetic variants that  
114 were not detected by the previously performed genetic tests. No known pathogenic single  
115 nucleotide variants (SNVs) were detected in the individuals analysed by patient-parents trio-  
116 based WGS (individuals P1 to P20), except for one pathogenic SNV that is associated with a  
117 part (haemophilia) of the phenotype of individual P1. A total of 46 unbalanced and 219  
118 balanced *de novo* SVs were identified in the genomes of the individuals (Fig.1b, Additional  
119 File 1: Fig. S1b, Additional File 2: Table S2). The detected SVs ranged from simple SVs to  
120 very complex genomic rearrangements that ranged from 4 to 40 breakpoint junctions per  
121 individual. Importantly, WGS confirmed all previously detected *de novo* SVs and revealed  
122 additional complexity of the SVs in 7 (39%) of the 18 cases who were not studied by WGS-  
123 based techniques before (Fig. 1c-d, Additional File 2: Table S2). In half of the cases with  
124 previously identified *de novo* copy number gains (4/8), the gains were not arranged in a  
125 tandem orientation, but instead they were inserted in another genomic region, which can have  
126 far-reaching consequences for accurate interpretation of the pathogenetic mechanisms in  
127 these individuals (Fig. 1d) [22–24]. This suggests that the complexity of copy number gains in  
128 particular is frequently underestimated by microarray analysis. For example, in one case (P11)  
129 a previously detected 170 kb copy number gain from chromosome 9 was actually inserted into  
130 chromosome X, 82 kb upstream of the *SOX3* gene (Fig. 1d, Additional File 1: Fig. S2). This  
131 inserted fragment contains a super-enhancer region that is active in craniofacial development  
132 [25] (Additional File 1: Fig. S2). The insertion of the super-enhancer may have disturbed the  
133 regulation of *SOX3* expression during palate development, which may have possibly caused  
134 the orofacial clefting in this individual [26–30]. The detection of these additional complexities  
135 in these seven patients exemplifies the added value that WGS analyses can have for cases  
136 that remain unresolved after standard array diagnostics [24].

137

### 138 ***In silico* phenomatching approach links directly affected genes to phenotypes**

139 Subsequently, we determined if the phenotypes of the patients could be explained by direct  
140 effects of the *de novo* SVs, most of which were previously classified as a variant of unknown  
141 significance (VUS), on genes. In total, 332 genes are directly affected (deleted, duplicated or  
142 truncated) by the SVs in the cohort (Additional File 1: Fig. S1d). The Phenomatch tool was  
143 used to match the HPO terms associated with these genes with the HPO terms used to  
144 describe the phenotypes of the individuals [16,17]. Genes were considered as candidate driver  
145 genes based on the height of their Phenomatch score, the number of phenomatches between  
146 the HPO terms of the gene and the patient, recessive or dominant mode of inheritance, Loss  
147 of Function constraint score (pLI) [31], Residual Variation Intolerance Score (RVIS) [32] and  
148 the presence in OMIM and/or DD2GP [33] databases (Table 1). Directly affected genes  
149 strongly or moderately associated with the phenotype are classified as tier 1 (T1) and tier 2  
150 (T2) candidate driver genes, respectively (Fig. 2a, Table 1). Genes with limited evidence for  
151 contribution to the phenotype are reported as tier 3 (T3) genes. In the cohort of 39 patients,  
152 this approach prioritized 2 and 13 of the 332 directly affected genes as T1 and T2 candidate  
153 drivers, respectively (Fig. 2b). In three cases, the HPO terms of the identified T1/T2 candidate  
154 driver genes could be matched to more than 75% of the HPO terms assigned to the patients,  
155 indicating that the effects of the SVs on these genes can explain most of the phenotypes of  
156 these patients. (Additional file 2: Table S3). In six other cases, directly affected T1/T2  
157 candidate drivers were identified that were only associated with a part of the patient's  
158 phenotypes (Additional file 2: Table S3).

159 Subsequently, we performed RNA sequencing on primary blood cells or  
160 lymphoblastoid cell lines derived from the individuals to determine the impact of *de novo* SVs  
161 on RNA expression of candidate driver genes. RNA sequencing confirmed that most  
162 expressed genes directly affected by *de novo* deletions show a reduced RNA expression (97  
163 of 107 genes with a median reduction of 0.46-fold compared to non-affected individuals) (Fig.  
164 2d). Although duplicated genes show a median 1.44-fold increase in expression, only 14 of 43

165 (~30%) of them are significantly overexpressed compared to expression levels in non-affected  
166 individuals. In total, 87 genes are truncated by SVs and four of these are classified as T1/T2  
167 candidate drivers. The genomic rearrangements lead to 12 possible fusions of truncated  
168 genes and RNA-seq showed an increased expression for two gene fragments due to formation  
169 of a fusion gene (Additional file 1: Fig. S3, Additional file 2: Table S4). However, none of the  
170 genes involved in the formation of fusion genes were associated with the phenotypes of the  
171 patients, although we cannot exclude an unknown pathogenic effect of the newly identified  
172 fusion genes. We could detect expression for three deleted and two duplicated T1/T2  
173 candidate drivers and these were differentially expressed when compared to controls. The  
174 RNA sequencing data suggests that most genes affected by *de novo* deletions show reduced  
175 RNA expression levels and limited dosage compensation. However, the observed increased  
176 gene dosage by *de novo* duplications does not always lead to increased RNA expression, at  
177 least in blood cells of patients.

178

### 179 **Prediction of positional effects of *de novo* SVs on neighbouring genes**

180 In 28 of the included cases (72%) our prioritization method did not predict T1/T2 candidate  
181 driver genes that are directly affected by the *de novo* SVs. Therefore, we investigated  
182 positional effects on the genes surrounding the *de novo* SVs to explain the phenotypes in  
183 those cases that were not fully explained by directly affected candidate driver genes. We  
184 extended our candidate driver gene prioritization analysis by including all the protein-coding  
185 genes located within 2 Mb of the breakpoint junctions, as most chromatin interactions are  
186 formed between loci that are less than 2Mb apart from each other [34]. Of the 2,754 genes  
187 adjacent to the SVs, 117 are moderately to strongly associated with the specific phenotypes  
188 of the individuals based on phenotype association analysis. However, this association with the  
189 phenotype does not necessarily mean that these genes located within 2Mb of the breakpoint  
190 junctions are really affected by the SVs and thus contributing to the phenotype. To determine  
191 if the regulation of these genes was affected, we first evaluated RNA expression levels of  
192 those genes. Three-quarters (81/117) of the genes linked to the phenotypes were expressed,

193 but only 9 of these showed reduced or increased expression (Fig. 2d). However, RNA  
194 expression in blood may not always be a relevant proxy for most neurodevelopmental  
195 phenotypes [35,36]. Therefore, we developed an extensive *in silico* strategy to predict potential  
196 disruption of the regulatory landscape of the genes surrounding the SVs (Additional file 1: Fig.  
197 S4). Because the interactions between genes and their regulatory elements are cell-type  
198 specific a large collection of tissue-specific Hi-C, TAD, promoter capture Hi-C (PCHiC), DNase  
199 hypersensitivity site (DHS), RNA and CHIP-seq datasets was included (Additional file 2: Table  
200 S5). Several embryonic and neural cell type (such as fetal brain and neural progenitor cells)  
201 datasets were included that may be especially relevant to study the neurodevelopmental  
202 phenotypes in our cohort.

203 For each gene, we selected the TAD it is located in [37–39], the PCHiC interactions  
204 with its transcription start site [40–43] and its DHS connections [44] for each assessed cell  
205 type and overlapped these features with the breakpoint junctions of the SVs to determine the  
206 proportion of disrupted genomic interactions (Methods, Additional file 1: Fig. S4). We also  
207 counted the number of enhancers (which are active in cell types in which the genes show the  
208 highest RNA expression [45]) that are located on disrupted portions of the TADs. Additionally,  
209 we performed virtual 4C (v4C) for each gene by selecting the rows of the normalized Hi-C  
210 matrices containing the transcription start site coordinates of the genes as viewpoints,  
211 because the coordinates of TAD boundaries can be dependent on the calling method and the  
212 resolution of the Hi-C [46–48] and because a significant portion of genomic interactions  
213 crosses TAD boundaries [9]. Integrated scores for TAD disruption, v4C disruption, potential  
214 enhancer loss, disruption of PCHiC interactions and DHS connections were used to calculate  
215 a positional effect support score for each gene (Additional file 1: Fig. S4). Finally, indirectly  
216 affected genes were classified as tier 1, 2 or 3 candidate drivers based on a combination of  
217 their association with the phenotype and their support score (Fig. 2a, Table 1).

218 Of the 117 genes that were associated with the phenotypes and located within 2 Mb  
219 of the SVs, 16 genes were predicted to be affected by the SVs based on the *in silico* analysis  
220 and therefore classified as T1/T2 candidate driver gene (Fig. 2b). The validity of the approach



221 was supported by the detection of pathogenic positional effects identified in previous studies.  
222 For example, the regulatory landscape of *SOX9* was predicted to be disturbed by a  
223 translocation 721 Kb upstream of the gene in individual P5, whose phenotype is mainly  
224 characterized by acampomelic campomelic dysplasia with Pierre-Robin Syndrome (PRS)  
225 including a cleft palate (Additional file 1: Fig. S6). SVs in this region have been predicted to  
226 disrupt interactions of *SOX9* with several of its enhancers further upstream, leading to  
227 phenotypes similar to the phenotype of individual P5 [49,50]. In individual P39, who has been  
228 previously included in other studies, our method predicted a disruption of *FOXP1* expression  
229 regulation due to a translocation (Additional file 1: Fig. S4), further supporting the hypothesis  
230 that deregulation of *FOXP1* caused the phenotype of this individual [51,52].

231 Another example of a predicted positional effect is the disruption of the regulatory  
232 landscape of the *HOXD* locus in individual P22. This individual has complex genomic  
233 rearrangements consisting of 40 breakpoint junctions on four different chromosomes likely  
234 caused by chromothripsis [53]. One of the inversions and one of the translocations are located  
235 in the TAD upstream (centromeric) of the *HOXD* gene cluster (Fig. 2c). This TAD contains  
236 multiple enhancers that regulate the precise expression patterns of the *HOXD* genes during  
237 the development of the digits [54–56]. Deletions of the gene cluster itself, but also deletions  
238 upstream of the cluster are associated with hand malformations [57–59]. The translocation in  
239 individual P22 disrupts one of the main enhancer regions (the global control region (GCR)),  
240 which may have led to altered regulation of the expression of *HOXD* genes, ultimately causing  
241 brachydactyly and clinodactyly in this patient.

242 Our approach predicted positional effects on T1/T2 candidate driver genes in 10  
243 included cases (26%). Most of these predicted positional effects were caused by breakpoint  
244 junctions of balanced SVs, suggesting that these effects may be especially important for  
245 balanced SVs.

246

247 **Prediction of driver genes improves molecular diagnosis**

248 By combining both directly and indirectly affected candidate drivers per patient we found  
249 possible explanations for the phenotypes of 16/39 (41%) complex and/or previously unsolved  
250 cases (Fig. 3a, Additional file 2: Table S3). Interestingly, in eight cases we found evidence for  
251 multiple candidate drivers that are individually only associated with part of the phenotype, but  
252 together may largely explain the phenotype (Fig. 3b). For example, we identified four  
253 candidate drivers in individual P25, who has a complex phenotype characterized by  
254 developmental delay, autism, seizures, renal agenesis, cryptorchidism and an abnormal facial  
255 shape (Fig. 3c). This individual has complex genomic rearrangements consisting of six  
256 breakpoint junctions and two deletions of ~10 Mb and ~0.6 Mb on three different chromosomes  
257 (Fig. 3d). The 6q13q14.1 deletion of ~10 Mb affects 33 genes including the candidate drivers  
258 *PHIP* and *COL12A1*, which have been associated with developmental delay, anxiety and facial  
259 dysmorphisms in other patients [60,61]. In addition to the two deleted drivers, two genes  
260 associated with other parts of the phenotype were predicted to be affected by positional effects  
261 (Fig. 3e). One of these genes is *TFAP2A*, whose TAD (characterized by a large gene desert)  
262 and long-range interactions overlap with a translocation breakpoint junction. Rearrangements  
263 affecting the genomic interactions between *TFAP2A* and enhancers active in neural crest cells  
264 located in the *TFAP2A* TAD have recently been implicated in branchio-oculofacial syndrome  
265 [62]. The regulation of *BMP2*, a gene linked to agenesis of the ribs and cardiac features, is  
266 also predicted to be disturbed by a complex SV upstream of this gene [63,64]. Altogether,  
267 these candidate driver genes may have jointly contributed to the phenotype of this individual  
268 (Fig. 3d). This case illustrates the challenge of identifying the causal genes driving the  
269 phenotypes of patients with structural rearrangements and highlights the notion that multiple  
270 genes should be considered for understanding the underlying molecular processes and  
271 explaining the patient's phenotype.

272

### 273 ***In silico* driver gene prediction in larger patient cohorts**

274 Our candidate driver prioritization approach identified many candidate drivers in previously  
275 unresolved cases, but these complex cases may not be fully representative for the general

276 patient population seen in clinical genetic diagnostics. Therefore, we applied our prediction  
277 method to two larger sets of patients with *de novo* SVs to further assess the validity and value  
278 of the approach. We focused on the genes located at or within 1 Mb of the SVs, because most  
279 of the candidate driver genes we identified in our own patient cohort were located within 1 Mb  
280 of an SV breakpoint junction (Additional file 1: Fig. S5b). First, we determined the effects of  
281 largely balanced structural variants in 228 previously described patients (Additional file 1: Fig.  
282 S7a) [51]. In 101 of the 228 (44%) cases the detected *de novo* SVs were previously classified  
283 as pathogenic or likely pathogenic and in all but four of these diagnosed cases one or more  
284 candidate driver genes have been proposed (Additional file 1: Fig. S7b). Our approach  
285 identified 46 T1 and 92 T2 candidate drivers out of 7406 genes located within 1 Mb of the SVs  
286 (Additional file 1: Fig. S7c,d, Additional file 2: Table S7). More than half (85/138) of the  
287 identified T1/T2 candidate drivers were not previously described as driver genes. In contrast,  
288 23/114 (22%) previously described pathogenic or likely pathogenic drivers were classified as  
289 T3 candidates and 38/114 (33%) were not reported as driver by our approach (Fig. 4a), mostly  
290 because the Phenomatch scores were below the threshold (46%) or because the genes were  
291 not associated with HPO terms (41%) (Additional file 1: Fig. S7e). T1/T2 candidate drivers  
292 were identified in 99/225 (44%) of the individuals with mostly balanced SVs, including 31  
293 individuals with SVs that were previously classified as VUS (Fig. 4b, Additional file 1: Fig. S8).  
294 Positional effect on genes moderately to strongly associated with the phenotypes were  
295 predicted in 63 (28%) of the cases with balanced SVs.

296 Subsequently, we also assessed the value of our driver prioritization approach for  
297 individuals with unbalanced copy number variants. We collected genetic and phenotypic  
298 information of 154 individuals with *de novo* copy number variants (<10 Mb) identified by clinical  
299 array-based copy number profiling (Additional file 1: Fig. S7a,b, Additional file 2: Table S6).  
300 The CNVs in the majority (83%) of these individuals have been previously classified as  
301 pathogenic according to clinical genetic diagnostic criteria (Additional file 1: Fig. S7b). These  
302 criteria are mostly based on the overlap of the CNVs with CNVs of other individuals with similar  
303 phenotypes and the causative driver genes were typically not previously specified. Our method

304 identified T1/T2 candidate driver genes in 87/154 (56%) individuals, including 9/26 individuals  
305 with CNVs previously classified as VUS (Fig. 4a, Additional file 2: Table S7). Interestingly,  
306 support for positional effects on candidate drivers was only found in 11% of the cases with  
307 CNVs, suggesting that pathogenic positional effects are more common in patients with  
308 balanced SVs than in patients with unbalanced SVs (Fig. 4b). No driver genes were identified  
309 for 39% of the previously considered pathogenic CNVs (based on recurrence in other  
310 patients). In some cases, potential drivers may remain unidentified because of incompleteness  
311 of the HPO database or insufficient description of the patient's phenotypes. However, given  
312 the WGS results described for our patient cohort, it is also likely that some complexities of the  
313 CNVs may have been missed by the array-based detection method. The data also suggests  
314 that many disease-causing genes or mechanisms are still not known, and that some SVs are  
315 incorrectly classified as pathogenic.

316

## 317 **Discussion**

318 About half of the patients with neurodevelopmental disorders do not receive a diagnosis after  
319 regular genetic testing based on whole exome sequencing and microarray-based copy  
320 number profiling [3]. Furthermore, the molecular mechanisms underlying the disease  
321 phenotype often remain unknown, even when a genetic variant is diagnosed as (potentially)  
322 pathogenic in an individual, as this is often only based on recurrence in patients with a similar  
323 phenotype. Here, we applied an integrative method based on WGS, computational  
324 phenomatching and prediction of positional effects to improve the diagnosis and molecular  
325 understanding of disease aetiology of individuals with *de novo* SVs.

326 Our WGS-approach identified additional complexities of the *de novo* SVs previously  
327 missed by array-based analysis in 7 of 18 cases, supporting previous findings that WGS can  
328 have an added value in identifying additional SVs that are not routinely detected by  
329 microarrays [24]. Our results indicate that duplications in particular are often more complex  
330 than interpreted by microarrays, which is in line with previous studies [22,65]. WGS can  
331 therefore be a valuable follow-up method to improve the diagnosis particularly of patients with

332 copy number gains classified as VUS. Knowing the exact genomic location and orientation of  
333 SVs is important for the identification of possible positional effects.

334 To systematically dissect and understand the impact of *de novo* SVs, we developed a  
335 computational tool based on integration of HiC, RNA-seq and ChIP-seq datasets to predict  
336 positional effects of SVs on the regulation of gene expression. We combined these predictions  
337 with phenotype association information to identify candidate driver genes. In 9/39 of the  
338 complex cases we identified candidate drivers that are directly affected by the break-junctions  
339 of the SVs. Positional effects of SVs have been shown to cause congenital disorders, but their  
340 significance is still unclear and they are not yet routinely screened for in genetic diagnostics  
341 [14]. Our method predicted positional effects on genes associated with the phenotype in 25%  
342 and 8% of all studied cases with balanced and unbalanced *de novo* SVs, respectively.  
343 Previous studies estimated that disruptions of TAD boundaries may be the underlying cause  
344 of the phenotypes of ~7.3% patients with balanced rearrangements [51] and of ~11.8% of  
345 patients with large rare deletions [16]. Our method identified a higher contribution of positional  
346 effects in patients with balanced rearrangements mainly because our method included more  
347 extensive chromatin conformation datasets and also screened for effects that may explain  
348 smaller portions of the phenotypes. Our method, although it incorporates most of all published  
349 chromatin conformation datasets on untransformed human cells, focuses on disruptions of  
350 interactions, which is a simplification of the complex nature of positional effects. It gives an  
351 insight in the potential effects that lead to the phenotypes and prioritizes candidates that need  
352 to be followed up experimentally, ideally in a developmental context for proofing causality.

353 SVs can affect many genes and multiple 'disturbed' genes may together contribute to  
354 the phenotype. Indeed, in eight cases we found support for the involvement of multiple  
355 candidate drivers that were affected by one or more *de novo* SVs. Nevertheless, in many of  
356 the studied cases our method did not detect candidate drivers. This may be due to insufficient  
357 data or knowledge about the genes and regulatory elements in the affected locus and/or due  
358 to missing disease associations in the used databases. Additionally, *de novo* SVs are also  
359 frequently identified in healthy individuals [66–68] and some of the detected SVs of unknown

360 significance may actually be benign and the disease caused by other genetic or non-genetic  
361 factors. The datasets underlying our computational workflow can be easily updated with more  
362 detailed data when emerging in the future, thereby enabling routine reanalysis of previously  
363 identified SVs. Moreover, our approach can be extended to study the consequences of SVs  
364 in different disease contexts such as cancer, where SVs also play a major causal role.

365

## 366 **Conclusions**

367 Interpretation of SVs is important for clinical diagnosis of patients with developmental  
368 disorders, but it remains a challenge because SVs can have many different effects on multiple  
369 genes. We developed an approach to gain a detailed overview of the genes and regulatory  
370 elements affected by *de novo* SVs in patients with congenital disease. We show that WGS  
371 can be useful as a second-tier test to detect variants that are not detected by exome- and  
372 array-based approaches.

373

## 374 **Methods**

### 375 **Patient selection and phenotyping**

376 A total of 39 individuals with *de novo* germline SVs and an inconclusive diagnosis were  
377 included in this study. Individuals P1 to P21 and their biological parents were included at the  
378 University Medical Center Utrecht (the Netherlands) under study ID NL55260.041.15 15-  
379 736/M. Individual P22, previously described by Redin *et al.* as UTR22 [51], and her parents  
380 were included at the San Luigi University Hospital (Italy). For individuals P23 to P39,  
381 lymphoblastoid cell lines (LCL cell lines) were previously derived as part of the Developmental  
382 Genome Anatomy Project (DGAP) of the Brigham and Women's Hospital and Massachusetts  
383 General Hospital, Boston, Massachusetts, USA [51]. Written informed consent was obtained  
384 for all included individuals and parents and the studies were approved by the respective  
385 institutional review boards.

386

### 387 **DNA and RNA extraction**

388 Peripheral blood mononuclear cells (PBMCs) were isolated from whole blood samples of  
389 individuals P1 to P22 and their biological parents using a Ficoll-Paque Plus gradient (GE  
390 Healthcare Life Sciences) in SepMate tubes (STEMCELL Technologies) according to the  
391 manufacturer's protocols. LCL cell lines derived from individuals P23 to P39 were expanded  
392 in RPMI 1640 medium supplemented with GlutaMAX (ThermoFisher Scientific), 10% fetal  
393 bovine serum, 1% penicillin, 1% streptomycin at 37°C. LCL cultures of each individual were  
394 split into three flasks and cultured separately for at least one week to obtain technical replicate  
395 samples for RNA isolation. Genomic DNA was isolated from the PBMCs or LCL cell lines using  
396 the QIASymphony DNA kit (Qiagen). Total RNA was isolated using the QIASymphony RNA  
397 Kit (Qiagen) and RNA quality (RIN > 8) was determined using the Agilent RNA 6000 Nano Kit.

398

#### 399 **Whole-genome sequencing**

400 Purified DNA was sheared to fragments of 400-500 bp using a Covaris sonicator. WGS  
401 libraries were prepared using the TruSeq DNA Nano Library Prep Kit (Illumina). WGS libraries  
402 were sequenced on an Illumina HiSeq X instrument generating 2x150 bp paired-end reads to  
403 a mean coverage depth of at least 30x. The WGS data was processed using an in-house  
404 Illumina analysis pipeline (<https://github.com/UMCUGenetics/IAP>). Briefly, reads were  
405 mapped to the CRCh37/hg19 human reference genome using BWA-0.7.5a using "BWA-MEM  
406 -t 12 -c 100 -M -R" [69]. GATK IndelRealigner [70] was used to realign the reads. Duplicated  
407 reads were removed using Sambamba markdup [71].

408

#### 409 **Structural variant calling and filtering**

410 Raw SV candidates were called with Manta v0.29.5 using standard settings [72] and Delly  
411 v0.7.2 [73] using the following settings: "-q 1 -s 9 -m 13 -u 5". Only Manta calls overlapping  
412 with breakpoint junctions called by Delly (+/- 100 basepairs) were selected. Rare SVs were  
413 selected by filtering against SV calls of 1000 Genomes [74] and against an in-house database  
414 containing raw Manta SV calls of ~120 samples ([https://github.com/UMCUGenetics/vcf-](https://github.com/UMCUGenetics/vcf-explorer)  
415 [explorer](https://github.com/UMCUGenetics/vcf-explorer)). *De novo* SVs were identified in individuals P1 to P22 by filtering the SVs of the

416 children against the Manta calls (+/- 100 basepairs) of the father and the mother. Filtered SV  
417 calls were manually inspected in the Integrative Genome Viewer (IGV). *De novo* breakpoint  
418 junctions of individuals P1 to P21 were validated by PCR using AmpliTaq gold (Thermo  
419 Scientific) under standard cycling conditions and by Sanger sequencing. Primers were  
420 designed using Primer3 software (Additional file S2: Table S2). Breakpoint junction  
421 coordinates for individuals P22 to P39 were previously validated by PCR [51,53].

422

### 423 **Single nucleotide variant filtering**

424 Single nucleotide variants and indels were called using GATK HaplotypeCaller. For individuals  
425 P1 to P21 (whose parents were also sequenced), reads overlapping exons were selected and  
426 the Bench NGS Lab platform (Agilent-Cartagenia) was used to detect possible pathogenic *de*  
427 *novo* or recessive variants in the exome. *De novo* variants were only analysed if they affect  
428 the protein structure of genes that are intolerant to missense and loss-of-function variants.  
429 Only putative protein changing homozygous and compound heterozygous variants with an  
430 allele frequency of <0.5% in ExAC [31] were reported.

431

### 432 **RNA-sequencing and analysis**

433 RNA-seq libraries were prepared using TruSeq Stranded Total RNA Library Prep Kit (Illumina)  
434 according to the manufacturer's protocol. RNA-seq libraries were pooled and sequenced on a  
435 NextSeq500 (Illumina) in 2x75bp paired-end mode. Processing of RNA sequencing data was  
436 performed using a custom in-house pipeline (<https://github.com/UMCUGenetics/RNASEq>).  
437 Briefly, reads were aligned to the CRCh37/hg19 human reference genome using STAR 2.4.2a  
438 [75]. The number of reads mapping to genes were counted using HTSeq-count 0.6.1 [76].  
439 Genes overlapping with SV breakpoints (eg truncated genes) were also analyzed separately  
440 by counting the number of reads mapping to exons per truncated gene fragment (up- and  
441 downstream of the breakpoint junction). RNA-seq data obtained from PBMCs (Individuals P1  
442 to P22) and LCL cell lines (Individuals P23 to P39) were processed as separate datasets. The  
443 R-package DESeq2 was used to normalize raw read counts and to perform differential gene



444 expression analysis for both datasets separately [77]. Genes with more than 0.5 reads per  
445 kilobase per million mapped reads (RPKM) were considered to be expressed.

446

#### 447 **Gene annotation**

448 Gene information (including genomic positions, Ensembl IDs, HGNC symbols and Refseq IDs)  
449 was obtained from Ensembl (GRCh37) using the R-package biomaRt (v2.38) [78]. Genes  
450 containing a RefSeq mRNA ID and a HGNC symbol were considered as protein-coding genes.  
451 Genomic coordinates for the longest transcript were used if genes contained multiple RefSeq  
452 mRNA IDs. The list of 19,300 protein-coding genes was further annotated with 1) pLI, 2) RVIS,  
453 3) haploinsufficiency (HI) scores, 4) OMIM identifiers and 5) DD2GP information for each gene  
454 (see Additional file 2: Table S5 for data sources). A phenotypic score based on these five  
455 categories was determined for each gene. Modes of inheritance for each gene were retrieved  
456 from the HPO and DD2GP databases.

457

#### 458 **Computational prediction of the effects of SVs on genes**

459 For each patient, the protein-coding genes located at or adjacent (< 2Mb) to the *de novo* SV  
460 breakpoint junctions were selected from the list of genes generated as described above. The  
461 HPO terms linked to these genes in the HPO database [19–21] were matched to each  
462 individual HPO term assigned to the patient and to the combination of the patient's HPO terms  
463 using Phenomatch [16,17]. For each gene, the number of phenomatchScores higher than 5  
464 ("phenomatches") with each individual HPO term of a patient was calculated. The strength of  
465 the association (none, weak, medium or strong) of each selected gene with the phenotype of  
466 the patient was determined based on the total phenomatchScore, the number of  
467 phenomatches, the mode of inheritance and the phenotypic score (Fig. S4a, Table 1).

468 Subsequently, potential direct and indirect effects of the SVs (none, weak or strong)  
469 on the genes were predicted (Fig. S4a, Table 1). The prediction analyses were based on  
470 chromatin organization and epigenetic datasets of many different cell types obtained from  
471 previous studies (see Additional file 2: Table S5 for data sources).

472 First, we determined which TADS of 20 different cell types overlapped with the *de novo*  
 473 SVs and which genes were located within these disrupted TADs [37–39] (Additional file 1: Fig.  
 474 S4b). To determine if the disrupted portions of the TADs contained regulatory elements that  
 475 may be relevant for the genes located in the affected TADs, we selected the three cell types  
 476 in which the gene is highest expressed based on RNA-seq data from the Encode/Roadmap  
 477 projects [45] reanalysed by Schmitt et al [37] (Additional file 1: Fig S4C). The number of active  
 478 enhancers (determined by chromHMM analysis of Encode/Roadmap ChIP-seq data [45]) in  
 479 the TADs up- and downstream of the breakpoint junction in the three selected cell types was  
 480 counted (Additional file 1: Fig S4D). Virtual 4C was performed by selecting the rows of the  
 481 normalized Hi-C matrices containing the transcription start site coordinates of the genes. The  
 482 v4C profiles were overlapped with the breakpoint junctions to determine the portion of  
 483 interrupted Hi-C interactions of the gene (Additional file 1: Fig. S4e). In addition, promoter  
 484 capture Hi-C data of 22 tissue types [40–43] and DNase-hypersensitivity site (DHS)  
 485 connections [44] were overlapped with the SV breakpoints to predict disruption of long range  
 486 interactions over the breakpoint junctions (Additional file 1: Fig. S4f). Genes with at least a  
 487 weak phenotype association and a weak SV effect are considered as T3 candidate genes.  
 488 Genes were classified as T1 candidate drivers if they have a strong association with the  
 489 phenotype and are strongly affected by the SV. Genes classified as T2 candidate driver can  
 490 have a weak/medium phenotype association combined with a strong SV effect or they can  
 491 have a medium/strong phenotype association with a weak SV effect (Fig. 2a, Table 1).

492

493 Table 1: Cut-offs used to classify affected genes as T1, T2 or T3 candidate driver genes.

| 1. Phenotype association |                                                    | Weak | Medium      | Strong      |
|--------------------------|----------------------------------------------------|------|-------------|-------------|
| Phenotypic score         | pLI > 0.9<br>RVIS < 10<br>HI < 10<br>DD2GP<br>OMIM | >0   | >0          | >2          |
| Mode of inheritance      |                                                    |      | AD/XD/XR+XY | AD/XD/XR+XY |
| phenomatchScore          |                                                    | >0   | >4          | >10         |

|                                                 |                                                                                      |                |                  |                    |                    |
|-------------------------------------------------|--------------------------------------------------------------------------------------|----------------|------------------|--------------------|--------------------|
| Phenomatches with individual HPO terms          | Score > 1<br>Score > 5                                                               | >0             | >10%             | >25%               |                    |
| <b>2. Effect of SV on gene</b>                  |                                                                                      |                |                  |                    |                    |
|                                                 |                                                                                      | Weak           |                  | Strong             |                    |
| Gene location                                   |                                                                                      | Adjacent       | Dup              | Adjacent           | DEL/TRUNC          |
| Support score                                   | TAD disrupted<br>V4C disrupted<br>PCHiC disrupted<br>DHS disrupted<br>RNA expression | >1             | NA               | >3                 | NA                 |
| <b>3. Driver classification</b>                 |                                                                                      |                |                  |                    |                    |
| Classification                                  |                                                                                      | T3             | T2               |                    | T1                 |
| Phenotype association +<br>Effect of SV on gene |                                                                                      | Weak +<br>Weak | Strong +<br>Weak | Medium +<br>Strong | Strong +<br>Strong |

494 pLI: probability of being loss-of-function intolerant, RVIS: Residual Variation Intolerance

495 Score, HI: Haploinsufficiency, DD2GP: Developmental Disorders Genotype-Phenotype

496 Database, OMIM: Online Mendelian Inheritance in Man, AD: Autosomal dominant, XD: X-

497 linked dominant, XR: X-linked recessive, XY: Y-linked, TAD: topologically associated

498 domain, V4C: virtual 4C, PCHiC: promoter capture Hi-C, DHS: DNase hypersensitivity site.

499

### 500 SV and phenotype information large patient cohorts

501 Breakpoint junction information and HPO terms for 228 individuals (excluding the individuals

502 already included in this study for WGS and RNA-seq analysis) with mostly balanced SVs were

503 obtained from Redin et al [51]. Phenotype and genomic information for 154 patients with *de*

504 *novo* copy number variants ascertained by clinical genomic arrays were obtained from an

505 inhouse patient database from the University Medical Center Utrecht (the Netherlands).

506

### 507 List of abbreviations

508 HPO: Human Phenotype Ontology; kb: kilobase; RPKM: reads per kilobase per million

509 mapped reads; SNV: Single nucleotide variant; SV: Structural variant; TAD: topologically

510 associated domain; VUS: Variant of unknown significance; WGS: Whole-genome sequencing

511

512 **Declarations**

513 **Ethics approval and consent to participate**

514 All individuals or their parents provided written informed consent to participate in the study.

515 The study was approved by the Medical Ethics Committee (METC) of the University Medical  
516 Center Utrecht (NL55260.041.15 15-736/M). The study was performed in accordance with the  
517 Declaration of Helsinki.

518 **Consent for publication**

519 All participants in this study provided consent for publication.

520 **Availability of data and material**

521 Whole genome sequencing and RNA sequencing datasets generated during the study have  
522 been deposited in the European Genome-phenome Archive (<https://www.ebi.ac.uk/ega>) under  
523 accession number EGAS00001003489. All custom code used in this study is available on  
524 [https://github.com/UMCUGenetics/Complex\\_SVs](https://github.com/UMCUGenetics/Complex_SVs).

525 **Competing interests**

526 The authors declare that they have no competing interests.

527 **Funding**

528 This work is supported by the funding provided by the Netherlands Science Foundation (NWO)  
529 Vici grant (865.12.004) to Edwin Cuppen.

530 **Authors' contributions**

531 SM and JV performed experiments and computational analyses. JG and RH ascertained and  
532 enrolled individuals P1 to P21 and provided phenotypic information. JK and SM cultured LCL  
533 cell lines. NB and LdIF performed DNA and RNA isolations and lab support. SB, RJ, MJvR  
534 and WK provided support for computational analyses. EvB collected genomic and phenotypic  
535 information of individuals U1-U111. GP provided material for individual P22. MET provided  
536 LCL cell lines and information of individuals P22-P39. SM, JV, JG, JK, and EC designed the  
537 study. SM, JV and EC wrote the manuscript. All authors read and approved the final  
538 manuscript.

539 **Acknowledgements**

540 We wish to thank all individuals who participated in this research. We thank Giulia Pregno and  
541 Giorgia Mandrile for the clinical and biological study of individual P22. We thank Utrecht  
542 Sequencing Facility (USEQ) for providing RNA-sequencing service and data. USEQ is  
543 subsidized by the University Medical Center Utrecht, Hubrecht Institute and Utrecht University.  
544 We would also like to thank the Hartwig Medical Foundation for providing whole genome  
545 sequencing services.

546

## 547 **References**

- 548 1. Weischenfeldt J, Symmons O, Spitz F, Korbel JO. Phenotypic impact of genomic  
549 structural variation: insights from and for human disease. *Nat Rev Genet.* 2013;14:125–38.
- 550 2. Carvalho CMB, Lupski JR. Mechanisms underlying structural variant formation in genomic  
551 disorders. *Nat Rev Genet.* 2016;17:224–38.
- 552 3. Wright CF, FitzPatrick DR, Firth HV. Paediatric genomics: diagnosing rare disease in  
553 children. *Nat Rev Genet.* 2018;19:325.
- 554 4. Hehir-Kwa JY, Pfundt R, Veltman JA, de Leeuw N. Pathogenic or not? Assessing the  
555 clinical relevance of copy number variants. *Clin Genet.* 2013;84:415–21.
- 556 5. Nowakowska B. Clinical interpretation of copy number variants in the human genome. *J*  
557 *Appl Genet.* 2017;58:449–57.
- 558 6. Krijger PHL, de Laat W. Regulation of disease-associated gene expression in the 3D  
559 genome. *Nat Rev Mol Cell Biol.* 2016;17:771–82.
- 560 7. Dekker J, Marti-Renom MA, Mirny LA. Exploring the three-dimensional organization of  
561 genomes: interpreting chromatin interaction data. *Nat Rev Genet.* 2013;14:390–403.
- 562 8. Bonev B, Cavalli G. Organization and function of the 3D genome. *Nat Rev Genet.*  
563 2016;17:772.
- 564 9. Rowley MJ, Corces VG. Organizational principles of 3D genome architecture. *Nat Rev*  
565 *Genet.* 2018;19:789-800.
- 566 10. Lupiáñez DG, Kraft K, Heinrich V, Krawitz P, Brancati F, Klopocki E, et al. Disruptions of  
567 topological chromatin domains cause pathogenic rewiring of gene-enhancer interactions.  
568 *Cell.* 2015;161:1012–25.
- 569 11. Franke M, Ibrahim DM, Andrey G, Schwarzer W, Heinrich V, Schöpflin R, et al.  
570 Formation of new chromatin domains determines pathogenicity of genomic duplications.  
571 *Nature.* 2016;538:265–9.
- 572 12. Will AJ, Cova G, Osterwalder M, Chan W-L, Wittler L, Brieske N, et al. Composition and  
573 dosage of a multipartite enhancer cluster control developmental expression of *Ihh* (Indian  
574 hedgehog). *Nat Genet.* 2017;49:1539–45.

- 575 13. Kragestein BK, Spielmann M, Paliou C, Heinrich V, Schöpflin R, Esposito A, et al.  
576 Dynamic 3D chromatin architecture contributes to enhancer specificity and limb  
577 morphogenesis. *Nat Genet.* 2018;50:1463–73.
- 578 14. Spielmann M, Lupiáñez DG, Mundlos S. Structural variation in the 3D genome. *Nat Rev*  
579 *Genet.* 2018;19:453-467.
- 580 15. Dixon JR, Jung I, Selvaraj S, Shen Y, Antosiewicz-Bourget JE, Lee AY, et al. Chromatin  
581 architecture reorganization during stem cell differentiation. *Nature.* 2015;518:331–6.
- 582 16. Ibn-Salem J, Köhler S, Love MI, Chung H-R, Huang N, Hurles ME, et al. Deletions of  
583 chromosomal regulatory boundaries are associated with congenital disease. *Genome Biol.*  
584 2014;15:423.
- 585 17. Zepeda-Mendoza CJ, Ibn-Salem J, Kammin T, Harris DJ, Rita D, Gripp KW, et al.  
586 Computational Prediction of Position Effects of Apparently Balanced Human Chromosomal  
587 Rearrangements. *Am J Hum Genet.* 2017;101:206–17.
- 588 18. Yauy K, Gatinois V, Guignard T, Sati S, Puechberty J, Gaillard JB, et al. Looking for  
589 Broken TAD Boundaries and Changes on DNA Interactions: Clinical Guide to 3D Chromatin  
590 Change Analysis in Complex Chromosomal Rearrangements and Chromothripsis. *Methods*  
591 *Mol Biol.* 2018;1769:353–61.
- 592 19. Köhler S, Schulz MH, Krawitz P, Bauer S, Dölken S, Ott CE, et al. Clinical diagnostics in  
593 human genetics with semantic similarity searches in ontologies. *Am J Hum Genet.*  
594 2009;85:457–64.
- 595 20. Köhler S, Vasilevsky NA, Engelstad M, Foster E, McMurry J, Aymé S, et al. The Human  
596 Phenotype Ontology in 2017. *Nucleic Acids Res.* 2017;45:D865–76.
- 597 21. Köhler S, Carmody L, Vasilevsky N, Jacobsen JOB, Danis D, Gouridine J-P, et al.  
598 Expansion of the Human Phenotype Ontology (HPO) knowledge base and resources.  
599 *Nucleic Acids Res.* 2018;47:D1018-27.
- 600 22. Brand H, Collins RL, Hanscom C, Rosenfeld JA, Pillalamarri V, Stone MR, et al. Paired-  
601 Duplication Signatures Mark Cryptic Inversions and Other Complex Structural Variation. *Am*  
602 *J Hum Genet.* 2015;97:170–6.
- 603 23. Nazaryan-Petersen L, Eisfeldt J, Pettersson M, Lundin J, Nilsson D, Wincent J, et al.  
604 Replicative and non-replicative mechanisms in the formation of clustered CNVs are indicated  
605 by whole genome characterization. *PLoS Genet.* 2018;14:e1007780.
- 606 24. Gilissen C, Hehir-Kwa JY, Thung DT, van de Vorst M, van Bon BWM, Willemsen MH, et  
607 al. Genome sequencing identifies major causes of severe intellectual disability. *Nature.*  
608 2014;511:344–7.
- 609 25. Wilderman A, VanOudenhove J, Kron J, Noonan JP, Cotney J. High-Resolution  
610 Epigenomic Atlas of Human Embryonic Craniofacial Development. *Cell Rep.* 2018;23:1581–  
611 97.
- 612 26. Brewer MH, Chaudhry R, Qi J, Kidambi A, Drew AP, Menezes MP, et al. Whole Genome  
613 Sequencing Identifies a 78 kb Insertion from Chromosome 8 as the Cause of Charcot-Marie-  
614 Tooth Neuropathy CMTX3. *PLoS Genet.* 2016;12:e1006177.
- 615 27. Haines B, Hughes J, Corbett M, Shaw M, Innes J, Patel L, et al. Interchromosomal  
616 Insertional Translocation at Xq26.3 Alters SOX3 Expression in an Individual With XX Male

- 617 Sex Reversal. *J Clin Endocrinol Metab.* 2015;100:E815–20.
- 618 28. Bunyan DJ, Robinson DO, Tyers AG, Huang S, Maloney VK, Grand FH, et al. X-Linked  
619 Dominant Congenital Ptosis Cosegregating with an Interstitial Insertion of a Chromosome  
620 1p21.3 Fragment into a Quasipalindromic Sequence in Xq27.1. *Open Journal of Genetics.*  
621 2014;04:415–25.
- 622 29. DeStefano GM, Fantauzzo KA, Petukhova L, Kurban M, Tadin-Strapps M, Levy B, et al.  
623 Position effect on FGF13 associated with X-linked congenital generalized hypertrichosis.  
624 *Proc Natl Acad Sci U S A.* 2013;110:7790–5.
- 625 30. Zhu H, Shang D, Sun M, Choi S, Liu Q, Hao J, et al. X-linked congenital hypertrichosis  
626 syndrome is associated with interchromosomal insertions mediated by a human-specific  
627 palindrome near SOX3. *Am J Hum Genet.* 2011;88:819–26.
- 628 31. Lek M, Karczewski KJ, Minikel EV, Samocha KE, Banks E, Fennell T, et al. Analysis of  
629 protein-coding genetic variation in 60,706 humans. *Nature.* 2016;536:285–91.
- 630 32. Petrovski S, Wang Q, Heinzen EL, Allen AS, Goldstein DB. Genic intolerance to  
631 functional variation and the interpretation of personal genomes. *PLoS Genet.*  
632 2013;9:e1003709.
- 633 33. Firth HV, Richards SM, Bevan AP, Clayton S, Corpas M, Rajan D, et al. DECIPHER:  
634 Database of Chromosomal Imbalance and Phenotype in Humans Using Ensembl  
635 Resources. *Am J Hum Genet.* 2009;84:524–33.
- 636 34. Rao SSP, Huntley MH, Durand NC, Stamenova EK, Bochkov ID, Robinson JT, et al. A  
637 3D map of the human genome at kilobase resolution reveals principles of chromatin looping.  
638 *Cell.* 2014;159:1665–80.
- 639 35. Cai C, Langfelder P, Fuller TF, Oldham MC, Luo R, van den Berg LH, et al. Is human  
640 blood a good surrogate for brain tissue in transcriptional studies? *BMC Genomics.*  
641 2010;11:589.
- 642 36. Tylee DS, Kawaguchi DM, Glatt SJ. On the outside, looking in: A review and evaluation  
643 of the comparability of blood and brain “-omes.” *Am J Med Genet B Neuropsychiatr Genet.*  
644 2013;162:595–603.
- 645 37. Schmitt AD, Hu M, Jung I, Xu Z, Qiu Y, Tan CL, et al. A Compendium of Chromatin  
646 Contact Maps Reveals Spatially Active Regions in the Human Genome. *Cell Rep.*  
647 2016;17:2042–59.
- 648 38. Won H, de la Torre-Ubieta L, Stein JL, Parikshak NN, Huang J, Opland CK, et al.  
649 Chromosome conformation elucidates regulatory relationships in developing human brain.  
650 *Nature.* 2016;538:523–7.
- 651 39. Wang D, Liu S, Warrell J, Won H, Shi X, Navarro FCP, et al. Comprehensive functional  
652 genomic resource and integrative model for the human brain. *Science.* 2018;362:eaat8464.
- 653 40. Cairns J, Freire-Pritchett P, Wingett SW, Várnai C, Dimond A, Plagnol V, et al.  
654 CHiCAGO: robust detection of DNA looping interactions in Capture Hi-C data. *Genome Biol.*  
655 2016;17:127.
- 656 41. Javierre BM, Burren OS, Wilder SP, Kreuzhuber R, Hill SM, Sewitz S, et al. Lineage-  
657 Specific Genome Architecture Links Enhancers and Non-coding Disease Variants to Target  
658 Gene Promoters. *Cell.* 2016;167:1369–84.e19.

- 659 42. Freire-Pritchett P, Schoenfelder S, Várnai C, Wingett SW, Cairns J, Collier AJ, et al.  
660 Global reorganisation of cis-regulatory units upon lineage commitment of human embryonic  
661 stem cells. *Elife*. 2017;6:e21926.
- 662 43. Rubin AJ, Barajas BC, Furlan-Magaril M, Lopez-Pajares V, Mumbach MR, Howard I, et  
663 al. Lineage-specific dynamic and pre-established enhancer-promoter contacts cooperate in  
664 terminal differentiation. *Nat Genet*. 2017;49:1522–8.
- 665 44. Thurman RE, Rynes E, Humbert R, Vierstra J, Maurano MT, Haugen E, et al. The  
666 accessible chromatin landscape of the human genome. *Nature*. 2012;489:75–82.
- 667 45. Roadmap Epigenomics Consortium, Kundaje A, Meuleman W, Ernst J, Bilenky M, Yen  
668 A, et al. Integrative analysis of 111 reference human epigenomes. *Nature*. 2015;518:317–30.
- 669 46. Zufferey M, Tavernari D, Oricchio E, Ciriello G. Comparison of computational methods  
670 for the identification of topologically associating domains. *Genome Biol*. 2018;19:217.
- 671 47. Dali R, Blanchette M. A critical assessment of topologically associating domain  
672 prediction tools. *Nucleic Acids Res*. 2017;45:2994–3005.
- 673 48. Yardımcı GG, Ozadam H, Sauria MEG, Ursu O, Yan K-K, Yang T, et al. Measuring the  
674 reproducibility and quality of Hi-C data. *Genome Biol*. 2019;20:57.
- 675 49. Benko S, Fantes JA, Amiel J, Kleinjan D-J, Thomas S, Ramsay J, et al. Highly  
676 conserved non-coding elements on either side of SOX9 associated with Pierre Robin  
677 sequence. *Nat Genet*. 2009;41:359–64.
- 678 50. Amarillo IE, Dipple KM, Quintero-Rivera F. Familial microdeletion of 17q24.3 upstream of  
679 SOX9 is associated with isolated Pierre Robin sequence due to position effect. *Am J Med  
680 Genet A*. 2013;161A:1167–72.
- 681 51. Redin C, Brand H, Collins RL, Kammin T, Mitchell E, Hodge JC, et al. The genomic  
682 landscape of balanced cytogenetic abnormalities associated with human congenital  
683 anomalies. *Nat Genet*. 2017;49:36–45.
- 684 52. Mehrjouy MM, Fonseca ACS, Ehmke N, Paskulin G, Novelli A, Benedicenti F, et al.  
685 Regulatory variants of FOXP1 in the context of its topological domain organisation. *Eur J  
686 Hum Genet*. 2018;26:186–96.
- 687 53. Cretu Stancu M, van Roosmalen MJ, Renkens I, Nieboer MM, Middelkamp S, de Ligt J,  
688 et al. Mapping and phasing of structural variation in patient genomes using nanopore  
689 sequencing. *Nat Commun*. 2017;8:1326.
- 690 54. Andrey G, Montavon T, Mascrez B, Gonzalez F, Noordermeer D, Leleu M, et al. A  
691 Switch Between Topological Domains Underlies HoxD Genes Collinearity in Mouse Limbs.  
692 *Science*. 2013;340:1234167–1234167.
- 693 55. Rodríguez-Carballo E, Lopez-Delisle L, Zhan Y, Fabre PJ, Beccari L, El-Idrissi I, et al.  
694 The HoxD cluster is a dynamic and resilient TAD boundary controlling the segregation of  
695 antagonistic regulatory landscapes. *Genes Dev*. 2017;31:2264–81.
- 696 56. Fabre PJ, Leleu M, Mormann BH, Lopez-Delisle L, Noordermeer D, Beccari L, et al.  
697 Large scale genomic reorganization of topological domains at the HoxD locus. *Genome Biol*.  
698 2017;18:149.
- 699 57. Svensson AM, Curry CJ, South ST, Whitby H, Maxwell TM, Aston E, et al. Detection of a  
700 de novo interstitial 2q microdeletion by CGH microarray analysis in a patient with limb



- 701 malformations, microcephaly and mental retardation. *Am J Med Genet A.* 2007;143A:1348–  
702 53.
- 703 58. Mitter D, Chiaie BD, Lüdecke H-J, Gillessen-Kaesbach G, Bohring A, Kohlhase J, et al.  
704 Genotype-phenotype correlation in eight new patients with a deletion encompassing 2q31.1.  
705 *Am J Med Genet A.* 2010;152A:1213–24.
- 706 59. Montavon T, Thevenet L, Duboule D. Impact of copy number variations (CNVs) on long-  
707 range gene regulation at the HoxD locus. *Proc Natl Acad Sci U S A.* 2012;109:20204–11.
- 708 60. Webster E, Cho MT, Alexander N, Desai S, Naidu S, Bekheirnia MR, et al. De novo  
709 PHIP-predicted deleterious variants are associated with developmental delay, intellectual  
710 disability, obesity, and dysmorphic features. *Molecular Case Studies.* 2016;2:a001172.
- 711 61. Engwerda A, Frentz B, den Ouden AL, Flapper BCT, Swertz MA, Gerkes EH, et al. The  
712 phenotypic spectrum of proximal 6q deletions based on a large cohort derived from social  
713 media and literature reports. *Eur J Hum Genet.* 2018;26:1478–89.
- 714 62. Laugsch M, Bartusel M, Rehimi R, Alirzayeva H, Karaolidou A, Crispatsu G, et al.  
715 Modeling the Pathological Long-Range Regulatory Effects of Human Structural Variation  
716 with Patient-Specific hiPSCs. *Cell Stem Cell.* 2019;24:736–52.e12.
- 717 63. Tan TY, Gonzaga-Jauregui C, Bhoj EJ, Strauss KA, Brigatti K, Puffenberger E, et al.  
718 Monoallelic BMP2 Variants Predicted to Result in Haploinsufficiency Cause Craniofacial,  
719 Skeletal, and Cardiac Features Overlapping Those of 20p12 Deletions. *Am J Hum Genet.*  
720 2017;101:985–94.
- 721 64. Kostina A, Bjork H, Ignatieva E, Irtyuga O, Uspensky V, Semenova D, et al. Notch, BMP  
722 and WNT/ $\beta$ -catenin network is impaired in endothelial cells of the patients with thoracic  
723 aortic aneurysm. *Atheroscler Suppl.* 2018;35:e6–13.
- 724 65. Newman S, Hermetz KE, Weckselblatt B, Rudd MK. Next-generation sequencing of  
725 duplication CNVs reveals that most are tandem and some create fusion genes at  
726 breakpoints. *Am J Hum Genet.* 2015;96:208–20.
- 727 66. Kloosterman WP, Francioli LC, Hormozdiari F, Marschall T, Hehir-Kwa JY, Abdellaoui A,  
728 et al. Characteristics of de novo structural changes in the human genome. *Genome Res.*  
729 2015;25:792–801.
- 730 67. Brandler WM, Antaki D, Gujral M, Kleiber ML, Whitney J, Maile MS, et al. Paternally  
731 inherited cis-regulatory structural variants are associated with autism. *Science.*  
732 2018;360:327–31.
- 733 68. Collins RL, Brand H, Karczewski KJ, Zhao X, Alföldi J, Khera AV, et al. An open  
734 resource of structural variation for medical and population genetics. *bioRxiv.* 2019:578674.
- 735 69. Li H, Durbin R. Fast and accurate short read alignment with Burrows-Wheeler transform.  
736 *Bioinformatics.* 2009;25:1754–60.
- 737 70. McKenna A, Hanna M, Banks E, Sivachenko A, Cibulskis K, Kernytzky A, et al. The  
738 Genome Analysis Toolkit: a MapReduce framework for analyzing next-generation DNA  
739 sequencing data. *Genome Res.* 2010;20:1297–303.
- 740 71. Tarasov A, Vilella AJ, Cuppen E, Nijman IJ, Prins P. Sambamba: fast processing of NGS  
741 alignment formats. *Bioinformatics.* 2015;31:2032–4.
- 742 72. Chen X, Schulz-Trieglaff O, Shaw R, Barnes B, Schlesinger F, Källberg M, et al. Manta:

- 743 rapid detection of structural variants and indels for germline and cancer sequencing  
744 applications. *Bioinformatics*. 2016;32:1220–2.
- 745 73. Rausch T, Zichner T, Schlattl A, Stütz AM, Benes V, Korbel JO. DELLY: structural  
746 variant discovery by integrated paired-end and split-read analysis. *Bioinformatics*.  
747 2012;28:i333–9.
- 748 74. Sudmant PH, Rausch T, Gardner EJ, Handsaker RE, Abyzov A, Huddleston J, et al. An  
749 integrated map of structural variation in 2,504 human genomes. *Nature*. 2015;526:75–81.
- 750 75. Dobin A, Davis CA, Schlesinger F, Drenkow J, Zaleski C, Jha S, et al. STAR: ultrafast  
751 universal RNA-seq aligner. *Bioinformatics*. 2013;29:15–21.
- 752 76. Anders S, Pyl PT, Huber W. HTSeq—a Python framework to work with high-throughput  
753 sequencing data. *Bioinformatics*. 2015;31:166–9.
- 754 77. Love MI, Huber W, Anders S. Moderated estimation of fold change and dispersion for  
755 RNA-seq data with DESeq2. *Genome Biol*. 2014;15:550.
- 756 78. Durinck S, Spellman PT, Birney E, Huber W. Mapping identifiers for the integration of  
757 genomic datasets with the R/Bioconductor package biomaRt. *Nature Protocols*.  
758 2009;4:1184–91.
- 759 79. Cotney J, Leng J, Yin J, Reilly SK, DeMare LE, Emera D, et al. The evolution of lineage-  
760 specific regulatory activities in the human embryonic limb. *Cell*. 2013;154:185–96.

761

## 762 **Figures, tables and additional files**

763 **Fig. 1** Characterization of *de novo* SVs in a cohort of individuals with neurodevelopmental  
764 disorders. **a** Frequencies of clinical phenotypic categories described for the 39 included  
765 individuals based on categories defined by HPO. Nervous system abnormalities are divided  
766 into four subcategories. **b** Number of *de novo* break junctions per SV type identified by WGS  
767 of 39 included patients. Most detected *de novo* SVs are part of complex genomic  
768 rearrangements involving more than three breakpoint junctions. **c** Number of cases in which  
769 WGS analysis identified new, additional or similar SVs compared to microarray-based copy  
770 number profiling. **d** Schematic representation of additional genomic rearrangements that were  
771 observed by WGS in five individuals. For each patient, the top panel shows the *de novo* SVs  
772 identified by arrays or karyotyping and bottom panel shows the structures of the SVs detected  
773 by WGS. The WGS data of individual P8 revealed complex chromoanasythesis  
774 rearrangements involving multiple duplications and an insertion of a fragment from chr14 into  
775 chr3. Individual P11 has an insertion of a fragment of chr9 into chrX that was detected as a

776 copy number gain by array-based analysis (Fig. S2). The detected copy number gains in  
777 individuals P12 and P21 show an interspersed orientation instead of a tandem orientation.  
778 The translocation in patient P20 appeared to be more complex than previously anticipated  
779 based on karyotyping results, showing 11 breakpoint junctions on three chromosomes.

780

781 **Fig. 2** Prediction of candidate driver genes directly and indirectly affected by the SVs. **a**  
782 Schematic overview of the computational workflow developed to detect candidate driver  
783 genes. Classification of genes at (direct) or surrounding (indirect) the *de novo* SVs is based  
784 on association of the gene with the phenotype and the predicted direct or indirect effect on the  
785 gene (Table 1). **b** Total number of identified tier 1, 2 and 3 candidate driver genes predicted  
786 to be directly or indirectly affected by an SV. **c** Genome browser overview showing the  
787 predicted disruption of regulatory landscape of the *HOXD* locus in individual P22. A 107 kb  
788 fragment (red shading) upstream of the *HOXD* locus (green shading) is translocated to a  
789 different chromosome and a 106 kb fragment (yellow shading) is inverted. The SVs affect the  
790 TAD centromeric of the *HOXD* locus which is involved in the regulation of gene expression in  
791 developing digits. The translocated and inverted fragments contain multiple mouse [55] and  
792 human (day E41) [79] embryonic limb enhancers, including the global control region (GCR).  
793 Disruptions of these developmental enhancers likely contributed to the limb phenotype of the  
794 patient. The virtual V4C track shows the HiC interactions per 10kb bin in germinal zone (GZ)  
795 cells using the *HOXD13* gene as viewpoint [38]. The bottom track displays the PCHiC  
796 interactions of the *HOXD13* gene in neuroectodermal cells [42]. UCSC Lifter was used to  
797 convert mm10 coordinates to hg19. **d** RNA expression levels of genes at or adjacent to *de*  
798 *novo* SVs. Log<sub>2</sub> fold RNA expression changes compared to controls (see methods)  
799 determined by RNA sequencing for expressed genes (RPKM >0.5) that are located within 2  
800 Mb of SV breakpoint junctions (FLANK) or that are inverted (INV), duplicated (DUP), deleted  
801 (DEL) or truncated (TRUNC). Differentially expressed genes ( $p < 0.05$ , calculated by DESeq2)  
802 are displayed in red.

803

804 **Fig. 3** SVs can affect multiple candidate drivers which jointly contribute to a phenotype. **a**  
805 Number of patients whose phenotype can be partially or largely explained by the predicted  
806 T1/T2 candidate drivers. These molecular diagnoses are based on the fraction of HPO terms  
807 assigned to the patients that have a phenomatchScore of more than five with at least one  
808 T1/T2 driver gene. **b** Scatterplot showing the number of predicted T1/T2 candidate drivers  
809 compared to the total number of genes at or adjacent (< 2Mb) to the *de novo* SVs per patient.  
810 **c** Heatmap showing the association of the four predicted T1/T2 candidate drivers with the  
811 phenotypic features (described by HPO terms) of individual P25. The numbers correspond to  
812 score determined by Phenomatch. The four genes are associated with different parts of the  
813 complex phenotype of the patient. **d** Ideogram of the derivative (der) chromosomes 6, 12 and  
814 20 in individual P25 reconstructed from the WGS data. WGS detected complex  
815 rearrangements with six breakpoint junctions and two deletions on chr6 and chr20 of  
816 respectively ~10 Mb and ~0.6 Mb. **e** Circos plot showing the genomic regions and candidate  
817 drivers affected by the complex rearrangements in individual P25. Gene symbols of T1/T2 and  
818 T3 candidate drivers are shown in respectively red and black. The break junctions are  
819 visualized by the lines in the inner region of the plot (red lines and highlights indicate the  
820 deletions). The middle ring shows the log<sub>2</sub> fold change RNA expression changes in  
821 lymphoblastoid cells derived from the patient compared to controls measured by RNA  
822 sequencing. Genes differentially expressed ( $p < 0.05$ ) are indicated by red (log<sub>2</sub> fold change <  
823 -0.5) and blue (log<sub>2</sub> fold change > 0.5) bars. The inner ring shows the organization of the TADs  
824 and their boundaries (indicated by vertical black lines) in germinal zone (GZ) brain cells [38].  
825 TADs overlapping with the *de novo* SVs are highlighted in red.

826

827 **Fig. 4** *In silico* prediction of candidate drivers in larger cohorts of patients with *de novo* SVs. **a**  
828 Comparison between previous SV classifications with the strongest candidate driver (located  
829 at or adjacent (<1 Mb) to these SVs) predicted by our approach. Two different patient cohorts,  
830 one containing mostly balanced SVs [51] and one containing copy number variants, were  
831 screened for candidate drivers. Our method identified T1/T2 candidate drivers for most SVs

832 previously classified as pathogenic or likely pathogenic. Additionally, the method detected  
833 T1/T2 candidate drivers for some SVs previously classified as VUS, which may lead to a new  
834 molecular diagnosis. **b** Quantification of the predicted effects of the SVs on proposed T1/T2  
835 candidate driver genes per cohort. Individuals with multiple directly and indirectly affected  
836 candidate drivers are grouped in the category described as “Both”. Indirect positional effects  
837 of SVs on genes contributing to phenotypes appear to be more common in patients with  
838 balanced SVs compared to patients with copy number variants.

839

#### 840 **Additional files**

841 **Additional file 1 (pdf):** Figures S1 to S8, including figure legends and supplemental  
842 references.

843 **Additional file 2 (xlsx): Table S1.** Phenotype information of the 39 included patients with *de*  
844 *novo* SVs. **Table S2.** Coordinates of the *de novo* SV breakpoint junctions detected in the 39  
845 individuals by WGS. **Table S3.** Candidate driver genes detected for each included patient.  
846 **Table S4.** Fusion genes detected in the patients by RNA sequencing. **Table S5.** List of  
847 external data sources used in this study. **Table S6.** Detected *de novo* copy number variants  
848 in 154 patients of the diagnostics cohort. **Table S7.** Candidate driver genes detected in  
849 patients' cohorts.

850

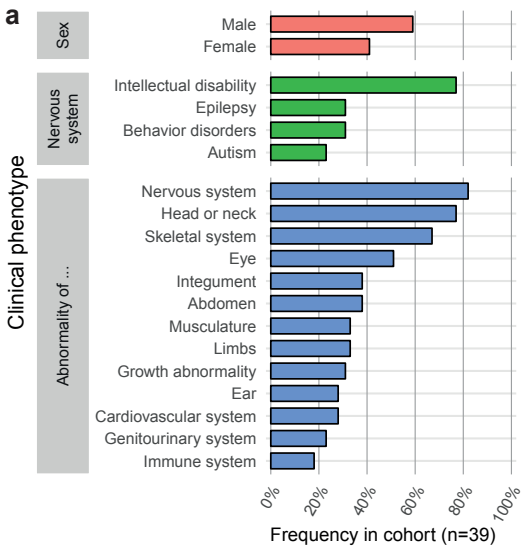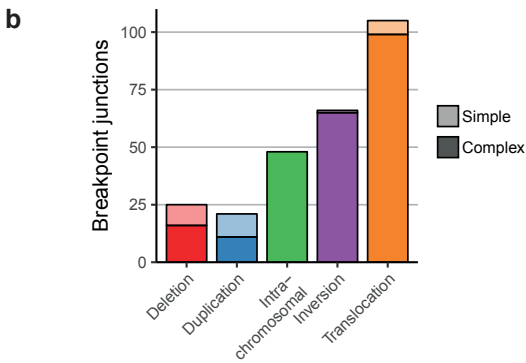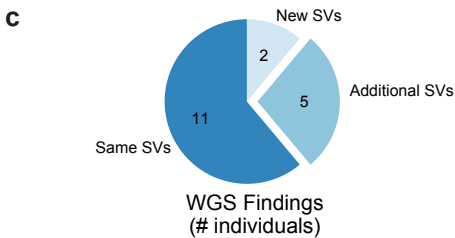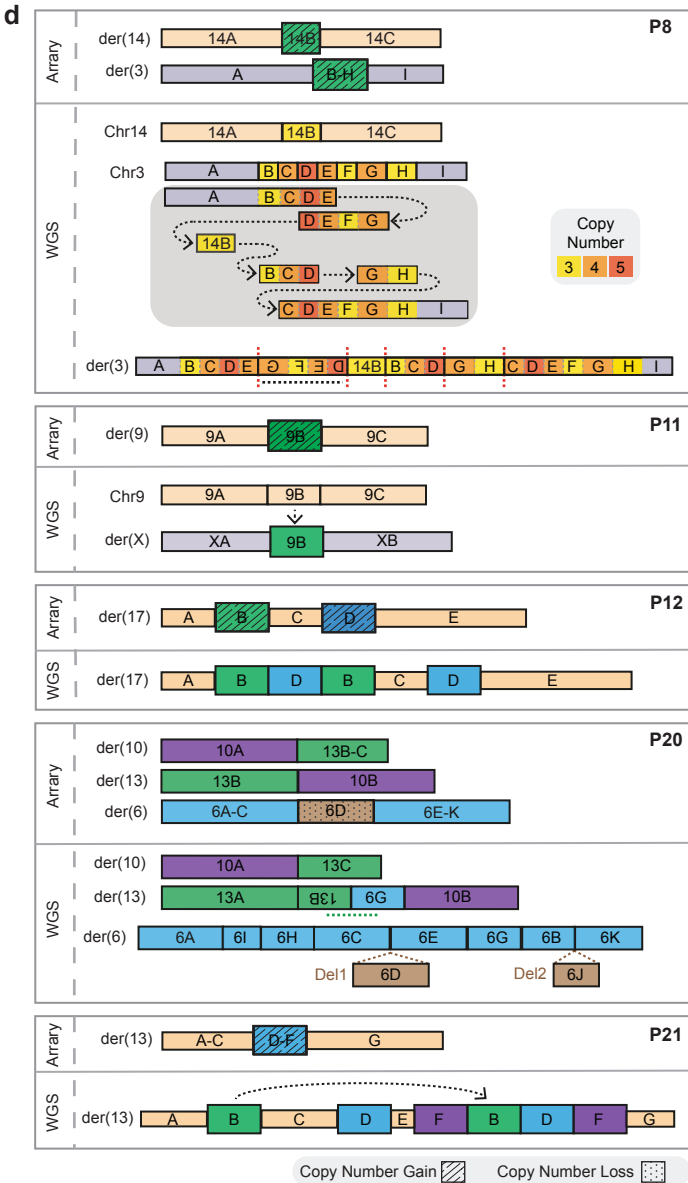

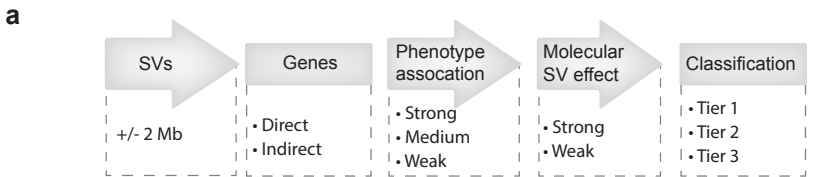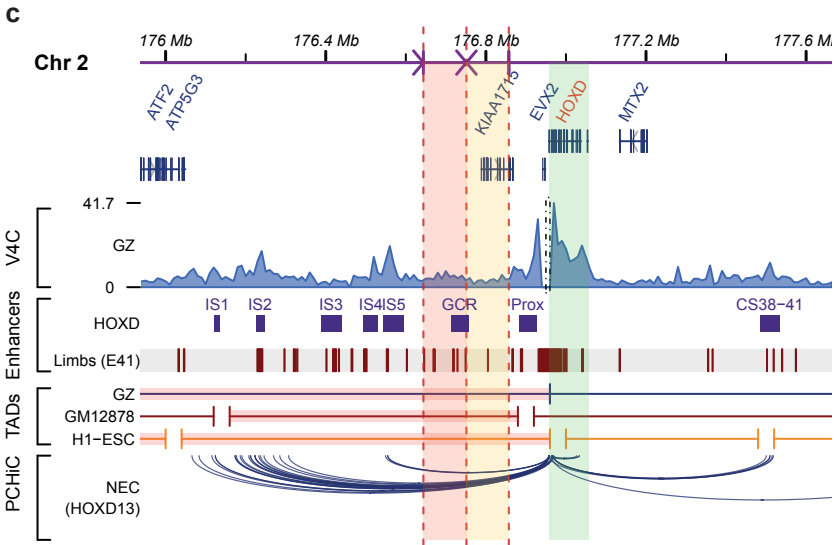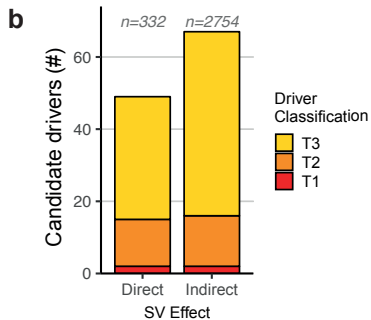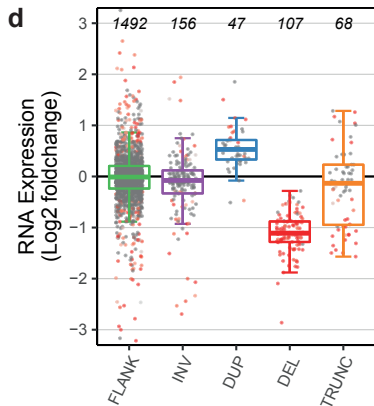

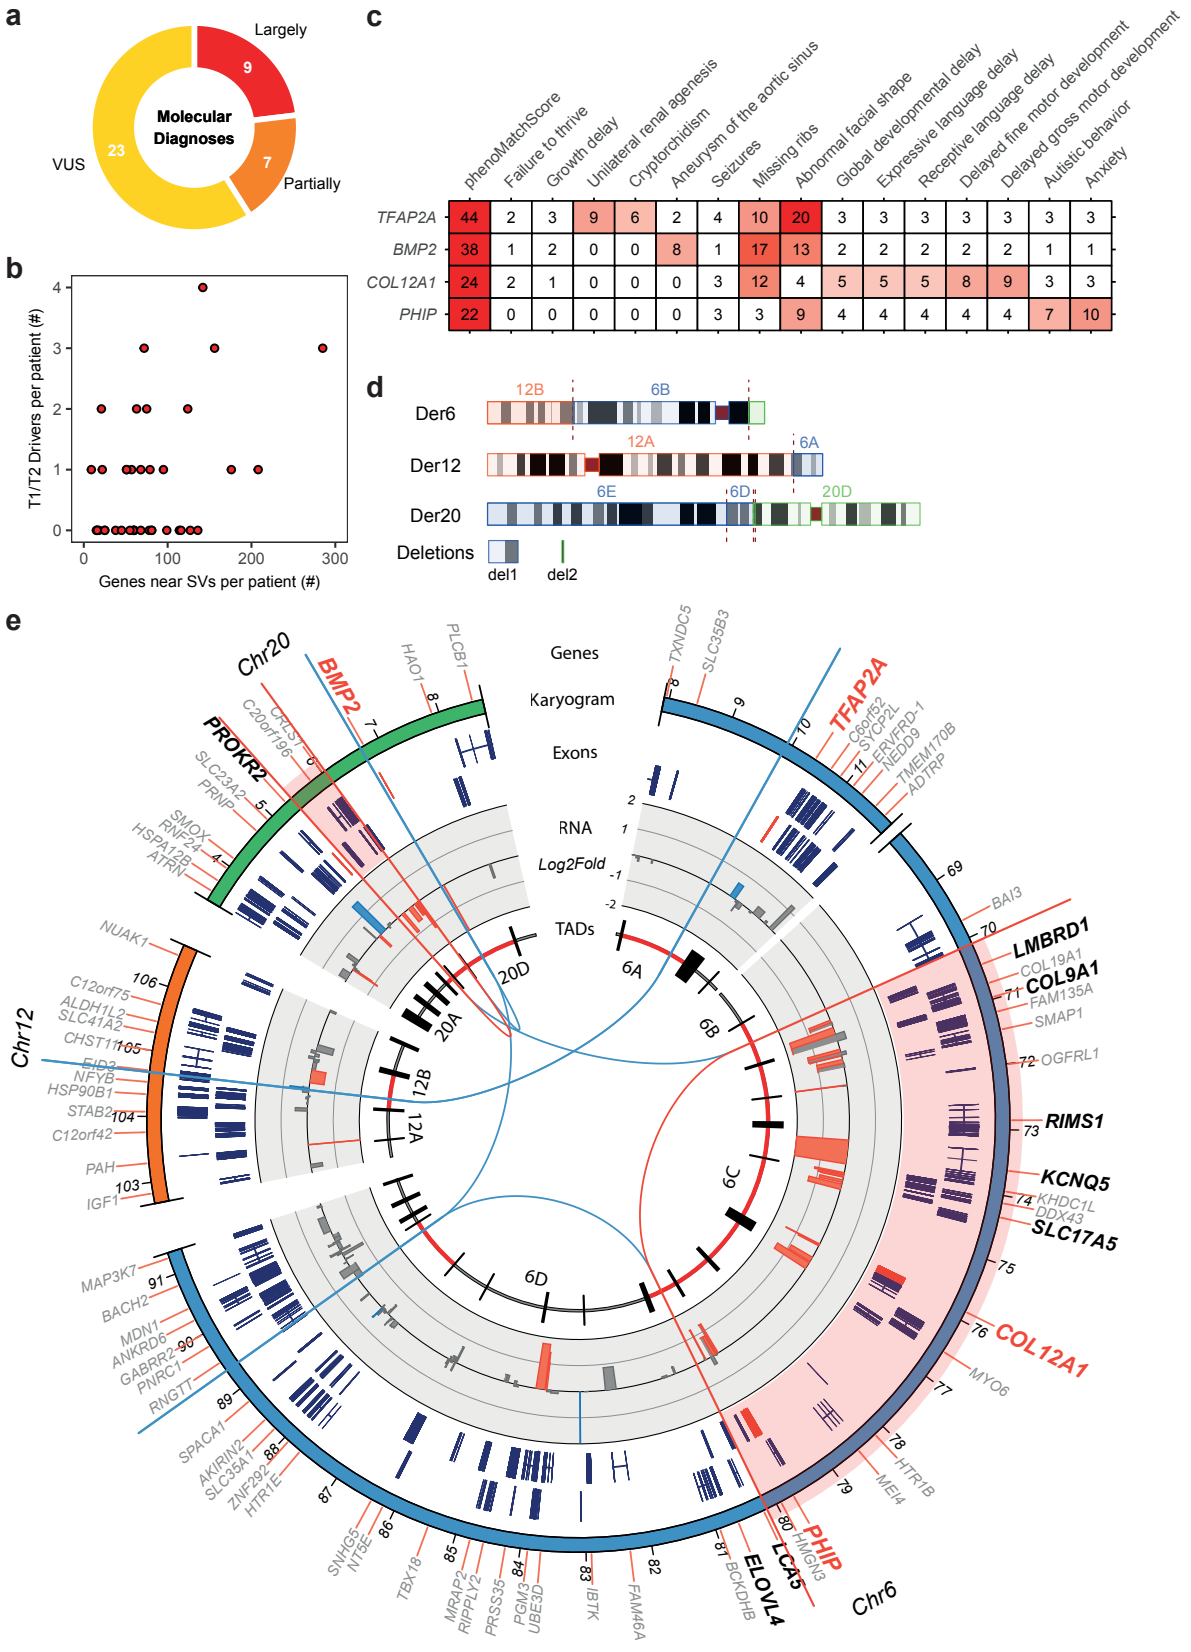



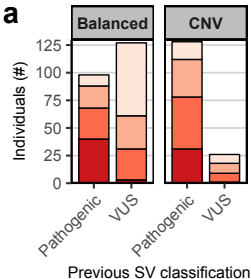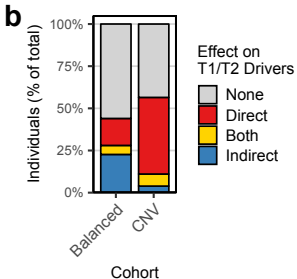

## Supplemental materials

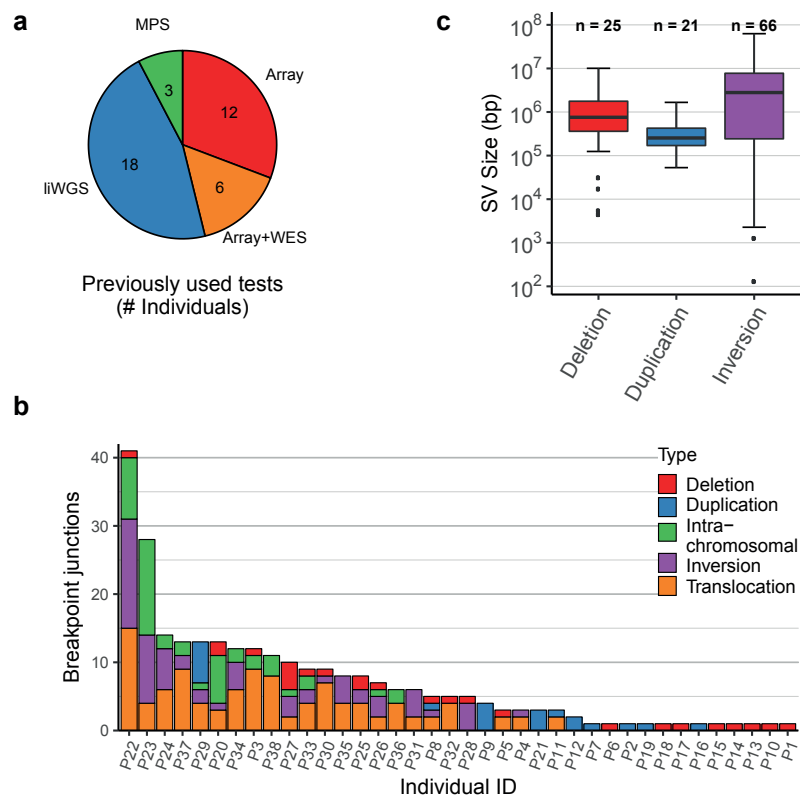

**Fig. S1** Detected *de novo* germline SVs in 39 included patients. **a** Genetic tests previously used in a clinical setting to identify the *de novo* SVs in the included individuals. Microarrays (ArrayCGH or SNP arrays) were used to detect the deletions and duplications in 18 of the included individuals. MPS: Mate-pair sequencing, WES: Whole Exome Sequencing, liWGS: long-insert Whole Genome Sequencing. **b** Number of identified *de novo* SV breakpoint junctions per individual. **c** Size distribution in base pairs (bp) of the identified *de novo* deletions (median size 757,378 bp), duplications (median size 253,729 bp) and inversions (median size 2,295,988 bp).

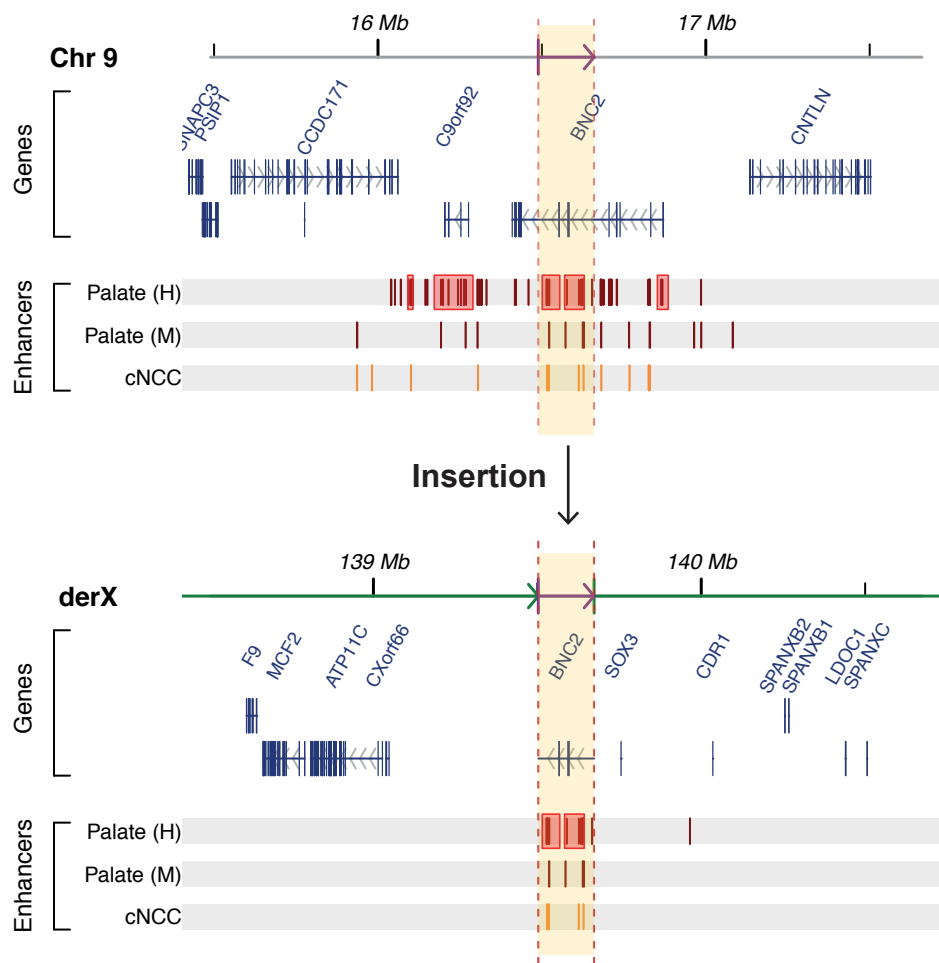

**Fig. S2** Insertion of a super-enhancer region upstream of *SOX3* detected by WGS in individual P11. A 170kb duplication in the *BNC2* gene body at chr9 was reported by array-based analysis (top panel), but WGS detected that this duplication is actually inserted in chrX (bottom panel). The fragment (highlighted in yellow) is inserted 82 kb upstream of the *SOX3* gene. This locus at chrX contains a palindromic sequence that is susceptible for formation of genomic rearrangement. Multiple patients with varying phenotypes and different insertions at this locus have been described [1–5]. The inserted fragment from chr9 contains multiple enhancers, including two previously described super-enhancer clusters (highlighted by red boxes), that are active in human (Palate (H), Carnegie stage 13) and mouse (Palate (M), embryonic day 11.5) craniofacial development and human cultured cranial neural crest cells (cNCC) [6–8]. The inserted enhancers may disturb the normal expression of the *SOX3* gene and/or the surrounding genes, which may have led to the cleft palate phenotype in this patient. Genomic coordinates of mouse (mm9) embryonic craniofacial enhancers (determined by p300 ChIP-seq [6]) were converted to hg19 coordinates using LiftOver (<https://genome.ucsc.edu/cgi-bin/hgLiftOver>).

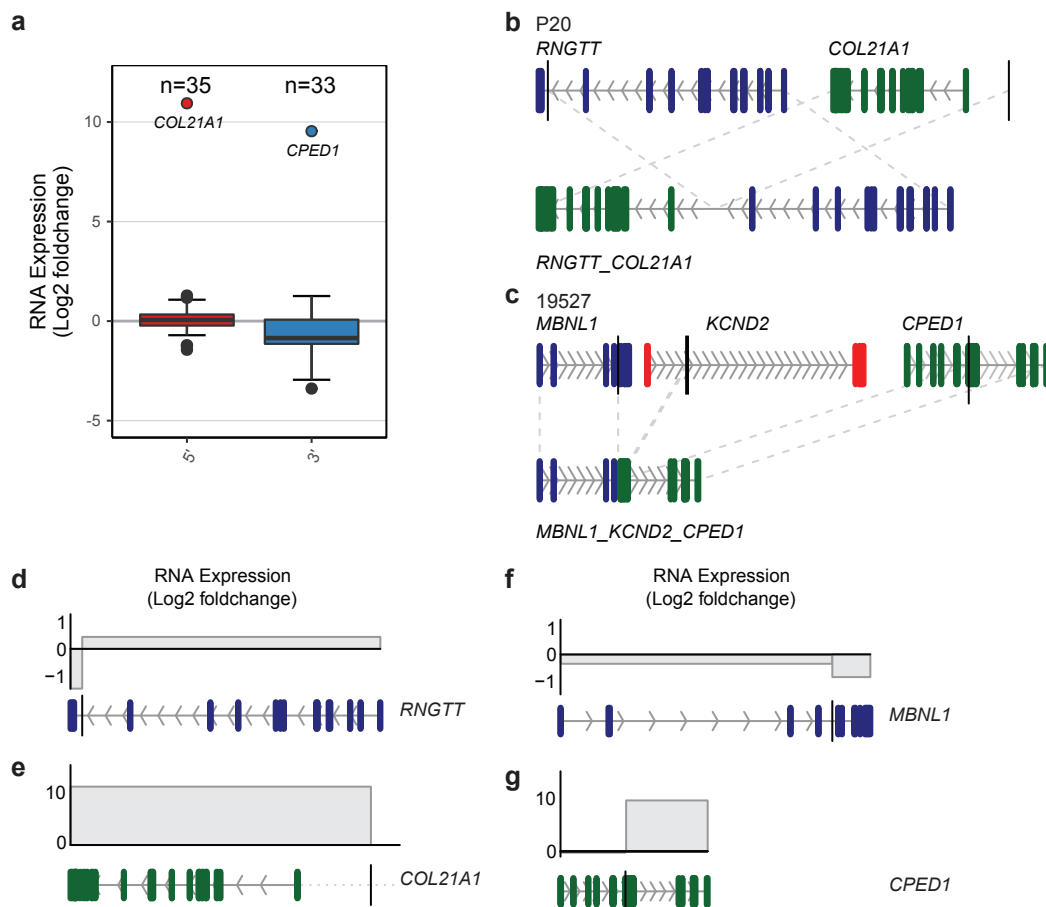

**Fig. S3** RNA expression of genes truncated by de novo germline SVs. **a** Log<sub>2</sub> fold change expression values (compared to expression of the exons in control individuals) for 5' gene fragments and 3' gene fragments of truncated genes. The 5' fragment of *COL21A1* and the 3' fragment of *CPED1* show a strong overexpression due to a gene fusion. **b** Schematic representation of the *RINGTT-COL21A1* fusion gene caused by genomic rearrangements in individual P20. The breakpoint junctions near the *RINGTT* (ENST00000369485) and *COL21A1* (ENST00000244728) gene bodies are depicted by the vertical black lines. **c** Schematic reconstruction of the *MBNL1-KCND2-CPED1* fusion gene in individual P34. Breakpoint junctions in the truncated genes *MBNL1* (ENST00000324210), *KCND2* (ENST00000331113) and *CPED1* (ENST00000310396) are represented by the vertical black lines. **d - g** RNA log<sub>2</sub> fold change expression values (compared to the expression in unaffected individuals) for the fragments of the truncated genes *RINGTT*, *COL21A1*, *MLBNL1* and *CPED1*.

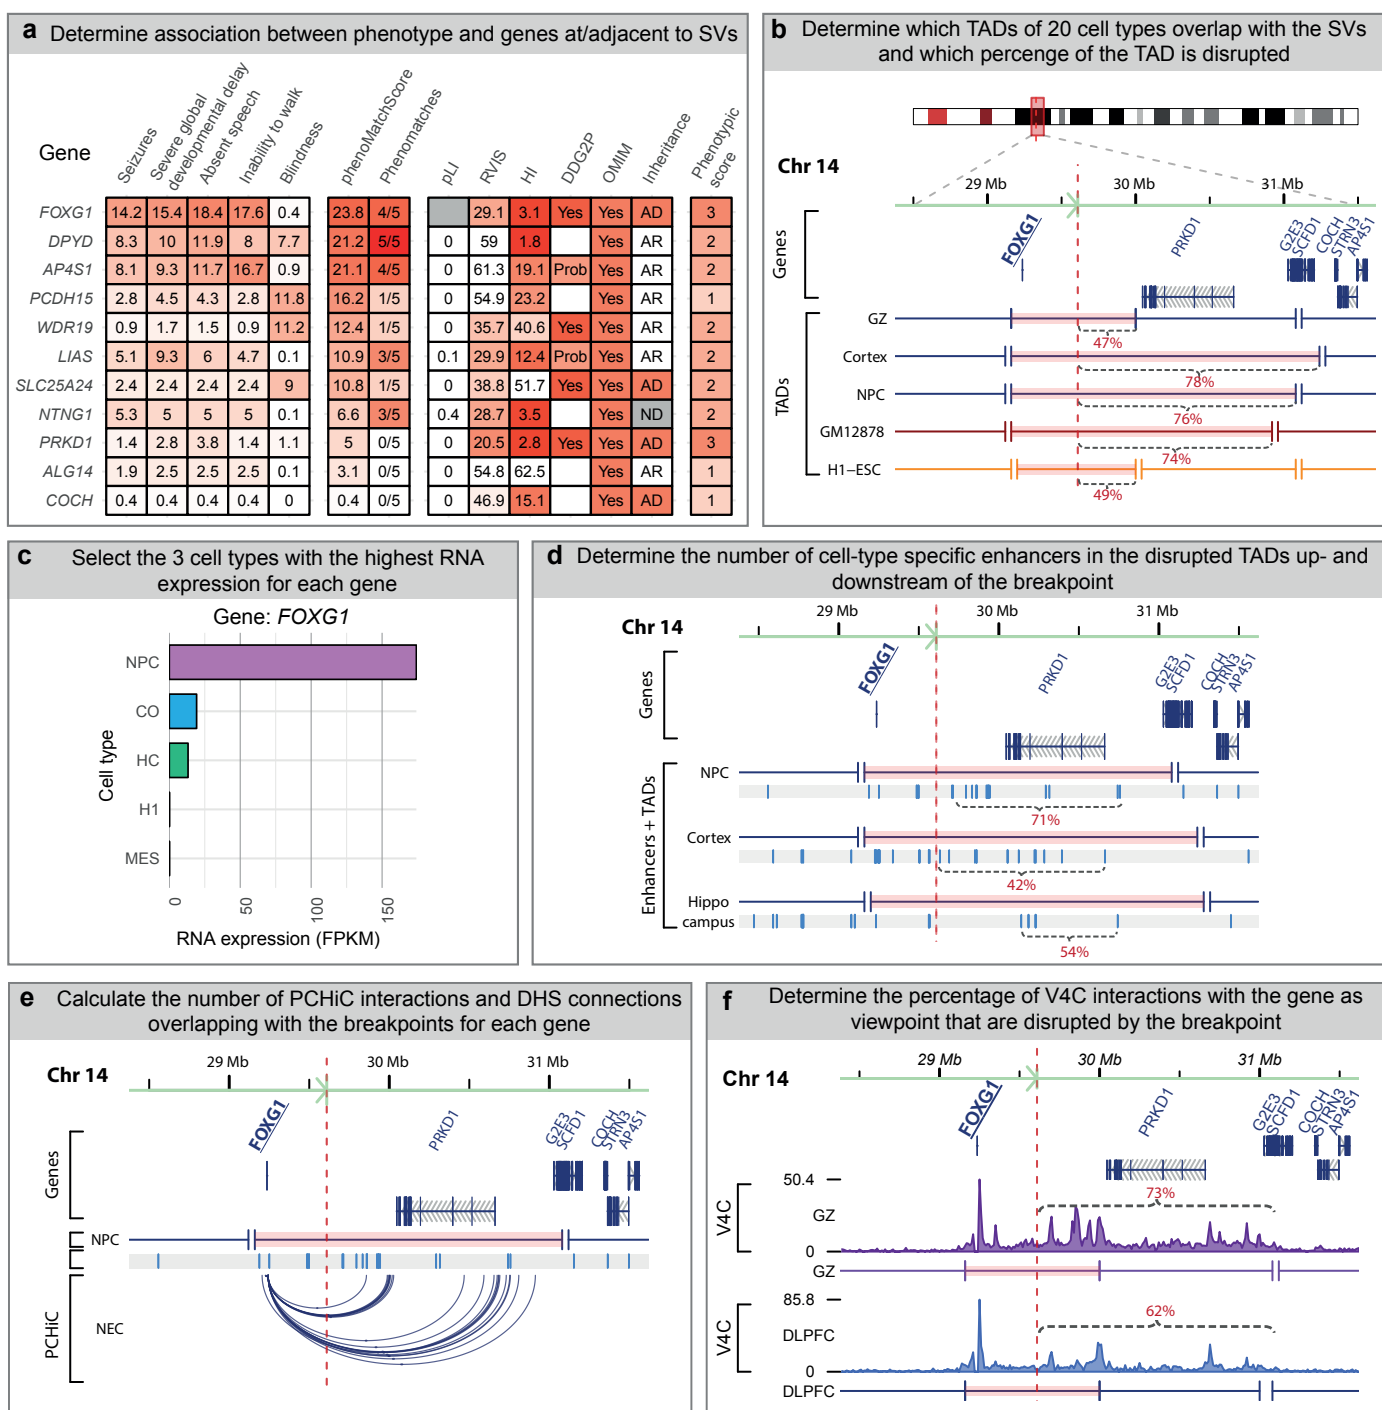

**Fig. S4** Schematic overview of computational strategy used to predict positional effects. **a** The association of a gene at or adjacent to an SV with the patient-specific phenotype is based on the PhenoMatch score, the number of phenomatches, mode of inheritance and the phenotypic score. Each gene has a fixed phenotypic score (ranging from 1 to 5) based on its pLI (>0.9), RVIS (<10) and haploinsufficiency (HI, <10) scores and the presence of the gene in DDG2P and OMIM. **b** The TADs of 20 different cell types are overlapped with the SV breakpoint junctions of the individual. The TADs affected by a breakpoint are split into fragments up- and downstream of the breakpoint and the size of each fragment (relative to the size of the intact TAD) is calculated. Subsequently the genes located on each fragment are determined and each gene receives a score based on the relative size of the fragment. For example, 47% of the TAD in germinal zone (GZ) cells containing *FOXG1* is considered disrupted. **c** For each gene the 3 cell types with the highest RNA expression (FPKM: Fragments Per Kilobase Million) based on the Encode/Roadmap ChIP-seq data are selected. (Continued on next page)

**d** For each gene, enhancers from the three selected cell types are overlapped with the disrupted TAD fragments. The number of enhancers in the disrupted part of the TAD is compared to the number of enhancers in the TAD fragment containing the gene. This ratio is considered as the percentage of enhancers moved away from the gene (for example, the location of 71% of neural progenitor cell enhancers in the *FOXP1*TAD is changed). **e** For each gene, PCHiC interactions of 22 cell types and promoter-DHS connections are overlapped with the breakpoint junctions. The number of interactions overlapping with the junctions is divided by the total number of interactions of the gene. For example, for *FOXP1* all 107 PCHiC interactions (in multiple cell types) overlap with the breakpoint junction. **f** Virtual 4C profiles were generated for each gene and these were overlapped with the breakpoint junctions to determine the percentage of interactions that are located up- or downstream of the breakpoint junction. For *FOXP1*, 73% of the V4C interactions in dorsolateral prefrontal cortex (DLPFC) cells are considered to be disrupted.

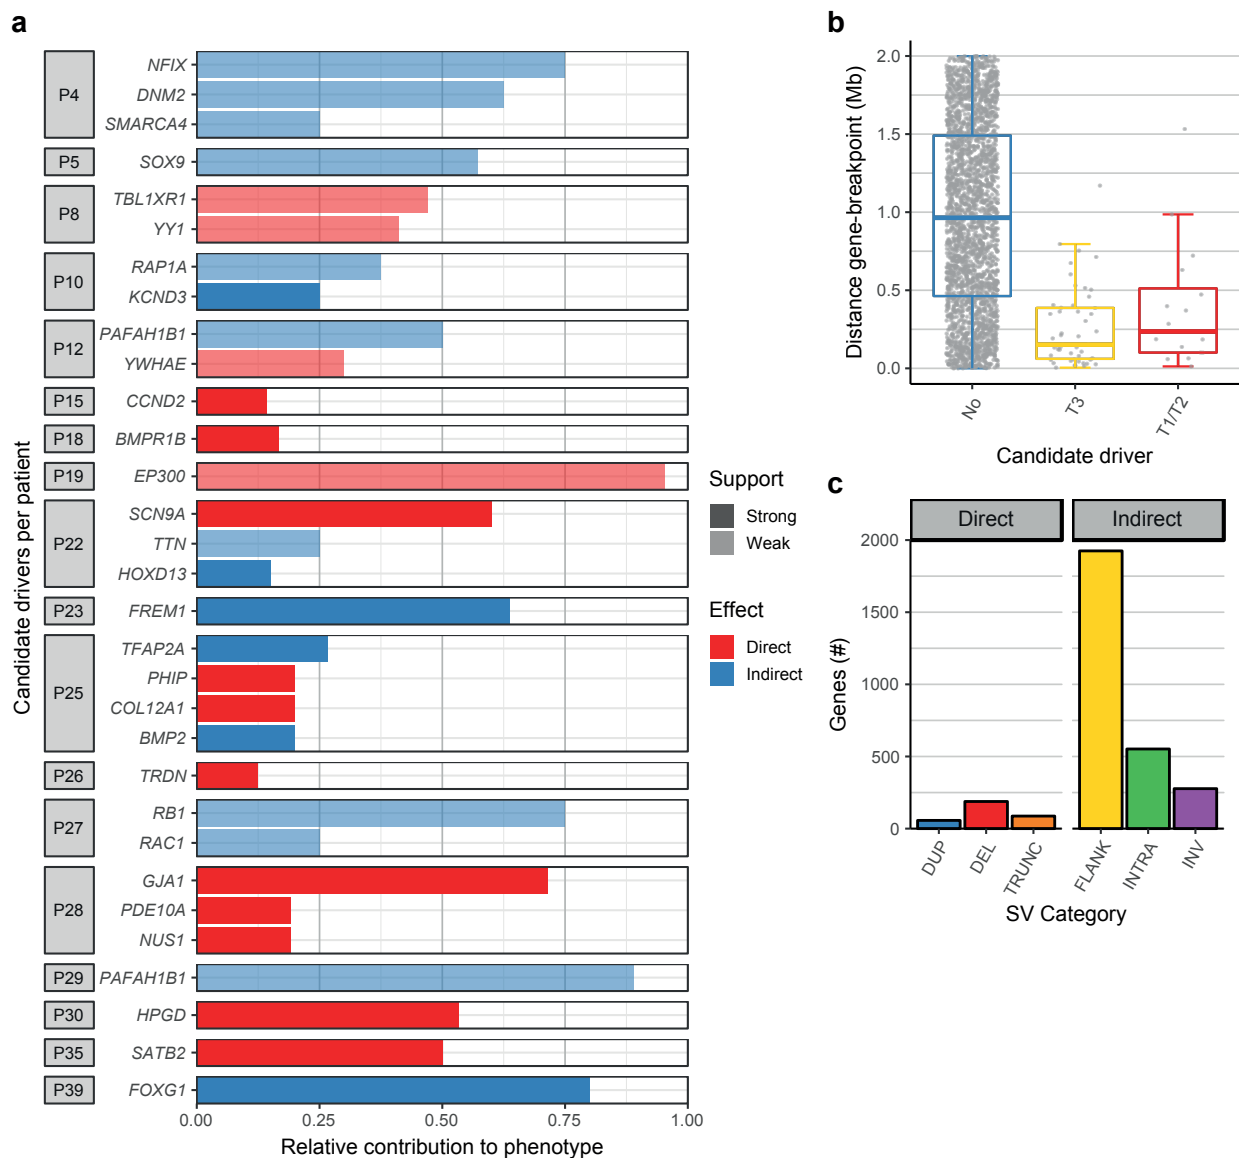

**Fig. S5** Overview of the detected candidate driver genes. **a** Relative contributions of the candidate drivers to the phenotypes of the individuals. The contributions are based on the number of Phenomatch hits (phenomatchScore > 5) of a gene with each individual HPO term assigned to an individual, e.g. a gene with a contribution of 0.75 is associated with 75% of the HPO terms of an individual. Shading indicates if there is relatively weak or strong evidence for an effect on the candidate driver. **b** Genomic distance (in base pairs) between the indirectly affected candidate driver genes (adjacent to the SVs) and the closest breakpoint junction. Most predicted candidate drivers are located within 1 Mb of a breakpoint junction. **c** Total number of analysed genes per SV category. DUP: Duplication, DEL: Deletion, TRUNC: Truncation, FLANK: Flanking region (+/- 2Mb), Intra: Intrachromosomal rearrangement, INV: Inversion.

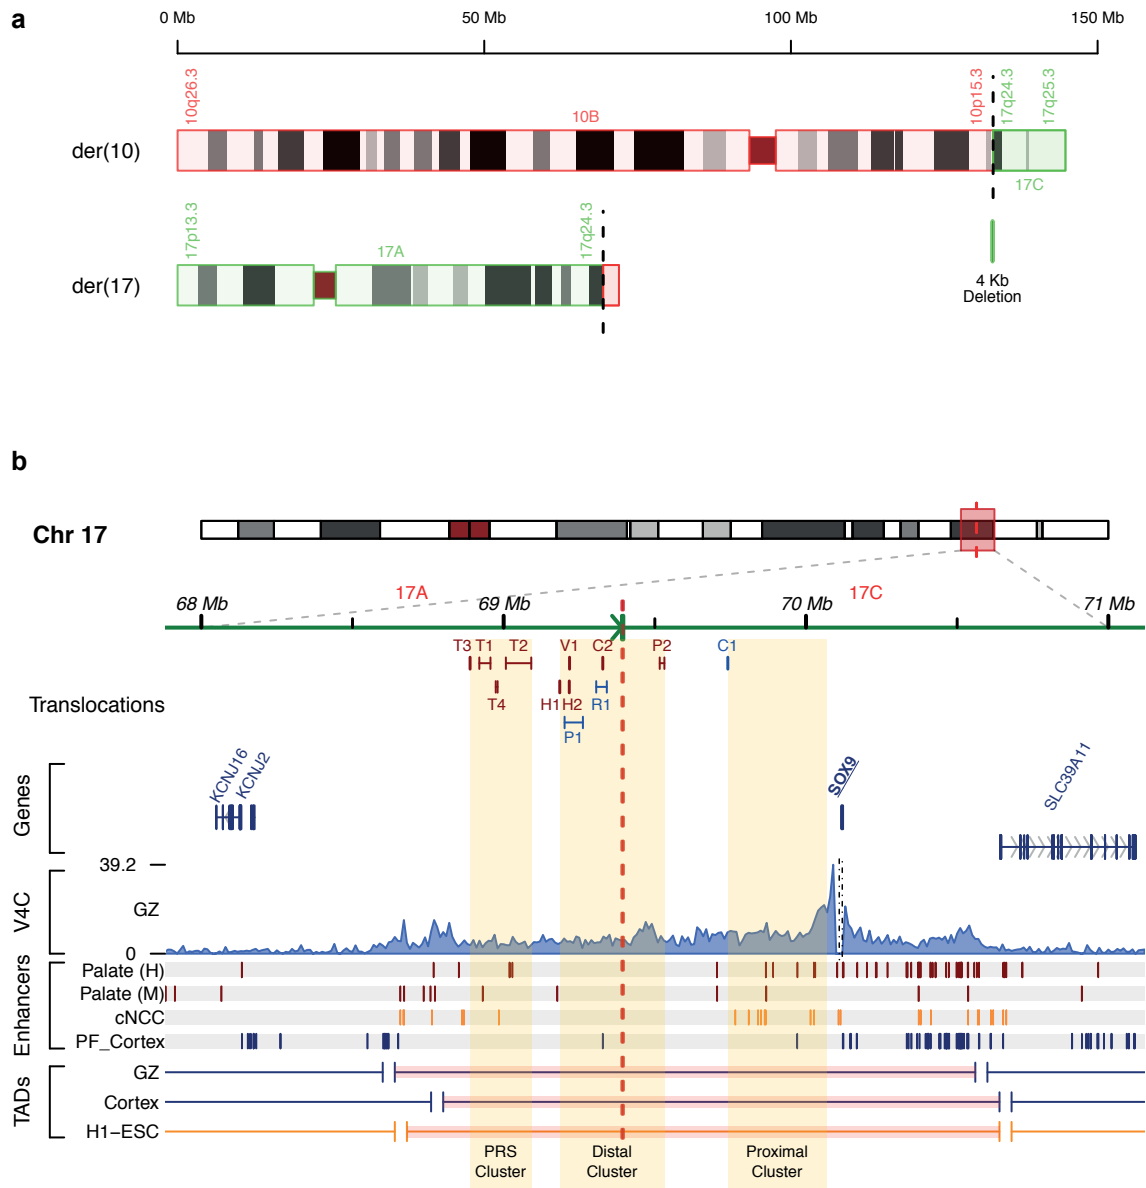

**Fig. S6** Prediction of positional effects of a translocation on *SOX9* in individual P5. **a** Ideogram of the derivative chromosomes in individual P5. WGS identified a de novo translocation between chromosome 10 and 17 (46,XY,t(10;17)(p15;q24)). The breakpoint on chr17 (chr17:69395684, indicated by the vertical dotted red line) is 721 kb upstream of *SOX9*. A small 4kb fragment from chr17 is deleted (chr17:69391279-69395683). **b** Genome browser overview showing region surrounding the translocation breakpoint (red dotted line) at chromosome 17 in individual P5. The phenotype of this individual is characterized by acampomelic campomelic dysplasia and Pierre-Robin Syndrome including cleft palate, micrognathia and a long philtrum. SVs including translocations have been detected upstream of *SOX9* in individuals with various phenotypes including campomelic dysplasia. The translocations found in patients with phenotypes including cleft palate are shown in red and translocations found in patients with different phenotypes are depicted in blue. These translocations are predicted to separate *SOX9* from enhancers active in the developing palate, which may lead to the cleft palate phenotypes. Information about the other patients was obtained from the following publications: T1+T2+T3 [9]; T4 [10]; C1+C2 [11]; P1+P2 [12]; V1 [13]; R1 [14]; H1+H2 [15].



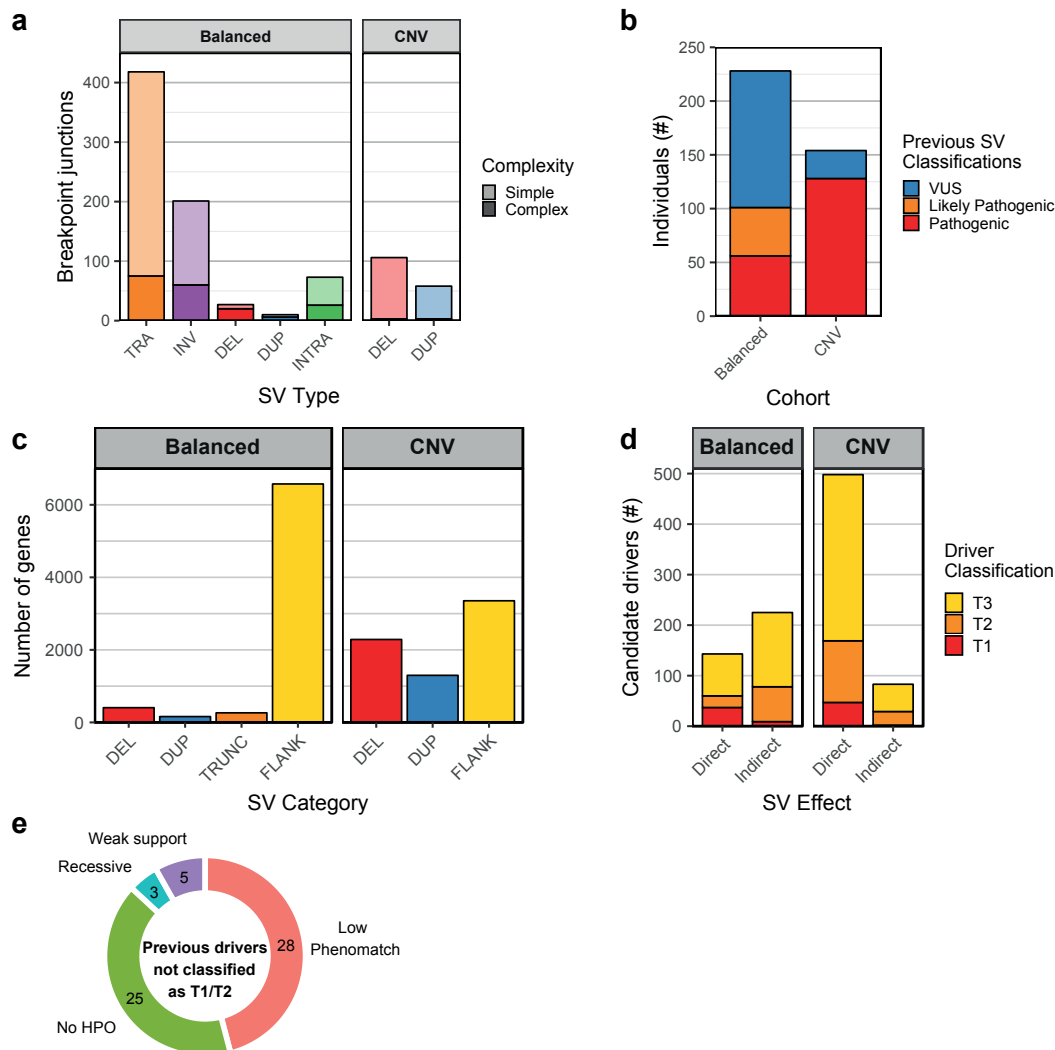

**Fig. S7** Overview of SVs and candidate drivers in two cohorts of patients with *de novo* SVs. **a** Quantification of previously identified *de novo* SVs in a cohort containing patients with mostly balanced SVs and a cohort containing patients with copy number variants (CNV). *De novo* translocations (TRA), inversions (INV) and intra-chromosomal rearrangements (INTRA) are most prevalent in the cohort of patients with balanced SVs. Some patients have complex genomic rearrangements (>3 SVs) including some deletions (DEL) or duplications (DUP). The cohort labelled as “CNV” consist of patients with relatively simple deletions and duplications (<10 Mb in size). **b** Number of patients whose *de novo* SVs were previously classified as pathogenic, likely pathogenic or variant of unknown significance (VUS) per cohort. **c** Total number of analysed genes per SV category in the two cohorts. Dup: Duplicated, Del: Deleted, Trunc: Truncated, Flank: Flanking SVs (<1 Mb). **d** Total number of predicted directly and indirectly affected candidate drivers per cohort. **e** Quantification of the genes that were previously classified as pathogenic or likely pathogenic (by Redin et al [16]), but not identified as T1 or T2 candidate driver by our approach. These classification differences may be caused by a lack of HPO terms associated with the gene, low phenomatch scores below the threshold of our method, insufficient (weak) support for an effect of an SV on the gene detected by our method or a presumed recessive mode of inheritance.

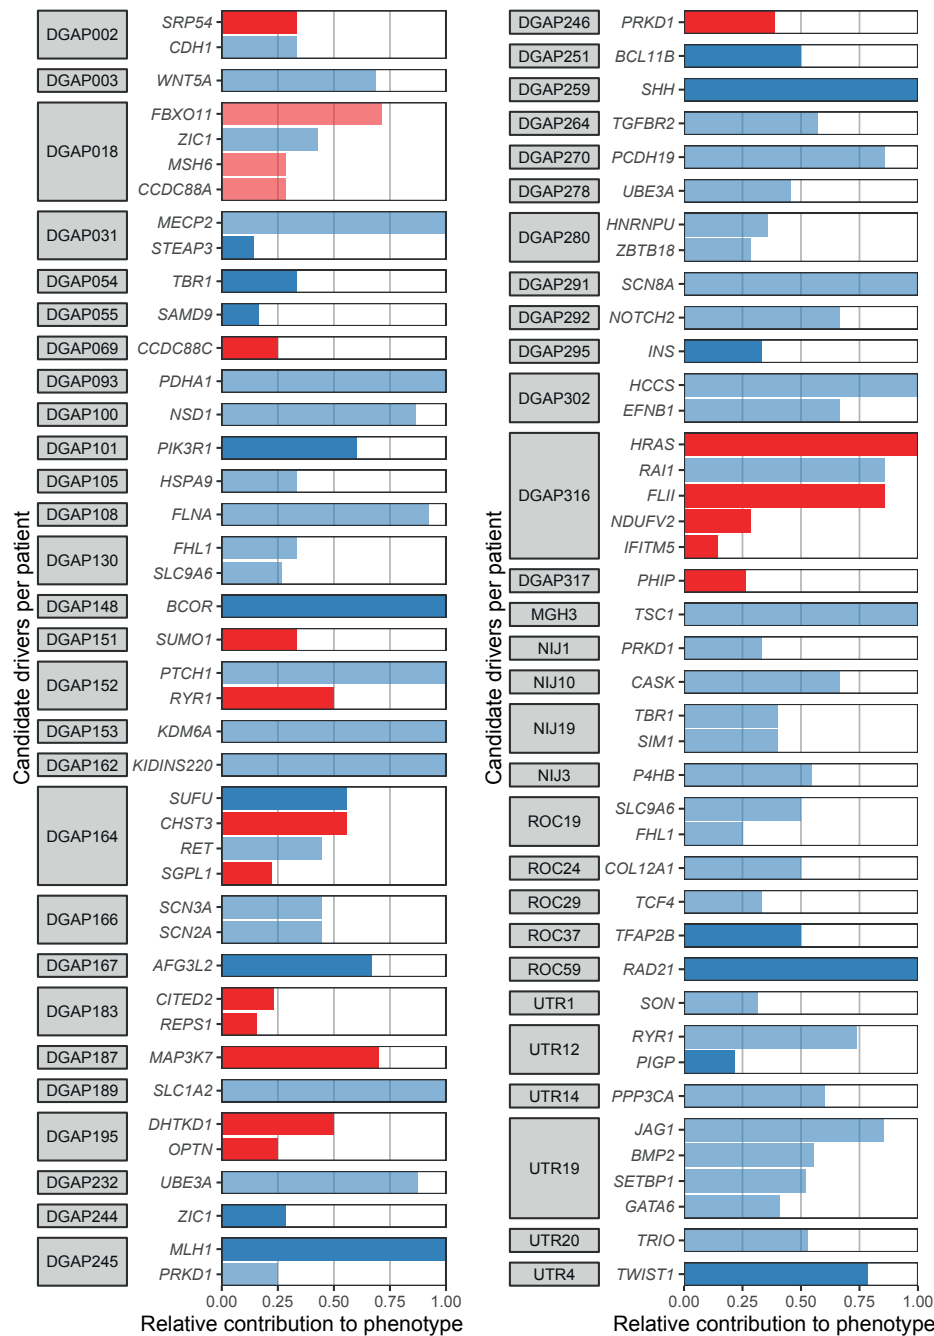

**Fig. S8** Predicted contributions of candidate drivers to the phenotypes of patients with balanced structural variants of unknown significance. T1/T2 candidate drivers were detected in 31 patients whose *de novo* SVs were previously classified as VUS by Redin et al [16]. The contributions to the phenotypes are based on the number of Phenomatch hits (phenomatchScore > 5) of the gene with each individual HPO term used to describe the phenotype of a patient. Shading indicates if there is relatively weak or strong evidence for an effect on the candidate driver.

## Supplemental references

1. Brewer MH, Chaudhry R, Qi J, Kidambi A, Drew AP, Menezes MP, et al. Whole Genome Sequencing Identifies a 78 kb Insertion from Chromosome 8 as the Cause of Charcot-Marie-Tooth Neuropathy CMTX3. *PLoS Genet.* 2016;12:e1006177.
2. Haines B, Hughes J, Corbett M, Shaw M, Innes J, Patel L, et al. Interchromosomal insertional translocation at Xq26.3 alters SOX3 expression in an individual with XX male sex reversal. *J Clin Endocrinol Metab.* 2015;100:E815–20.
3. Bunyan DJ, Robinson DO, Tyers AG, Huang S, Maloney VK, Grand FH, et al. X-Linked Dominant Congenital Ptosis Cosegregating with an Interstitial Insertion of a Chromosome 1p21.3 Fragment into a Quasipalindromic Sequence in Xq27.1. *OJGen.* 2014;04:415–25.
4. DeStefano GM, Fantauzzo KA, Petukhova L, Kurban M, Tadin-Strapps M, Levy B, et al. Position effect on FGF13 associated with X-linked congenital generalized hypertrichosis. *Proc Natl Acad Sci U S A.* 2013;110:7790–5.
5. Zhu H, Shang D, Sun M, Choi S, Liu Q, Hao J, et al. X-linked congenital hypertrichosis syndrome is associated with interchromosomal insertions mediated by a human-specific palindrome near SOX3. *Am J Hum Genet.* 2011;88:819–26.
6. Attanasio C, Nord AS, Zhu Y, Blow MJ, Li Z, Liberton DK, et al. Fine tuning of craniofacial morphology by distant-acting enhancers. *Science.* 2013;342:1241006.
7. Prescott SL, Srinivasan R, Marchetto MC, Grishina I, Narvaiza I, Selleri L, et al. Enhancer divergence and cis-regulatory evolution in the human and chimp neural crest. *Cell.* 2015;163:68–83.
8. Wilderman A, VanOudenhove J, Kron J, Noonan JP, Cotney J. High-Resolution Epigenomic Atlas of Human Embryonic Craniofacial Development. *Cell Rep.* 2018;23:1581–97.
9. Benko S, Fantes JA, Amiel J, Kleinjan D-J, Thomas S, Ramsay J, et al. Highly conserved non-coding elements on either side of SOX9 associated with Pierre Robin sequence. *Nat Genet.* 2009;41:359–64.
10. Jakobsen LP, Ullmann R, Christensen SB, Jensen KE, Mølsted K, Henriksen KF, et al. Pierre Robin sequence may be caused by dysregulation of SOX9 and KCNJ2. *J Med Genet.* 2007;44:381–6.
11. Leipoldt M, Erdel M, Bien-Willner GA, Smyk M, Theurl M, Yatsenko SA, et al. Two novel translocation breakpoints upstream of SOX9 define borders of the proximal and distal breakpoint cluster region in campomelic dysplasia. *Clin Genet.* 2007;71:67–75.
12. Fonseca ACS, Bonaldi A, Bertola DR, Kim CA, Otto PA, Vianna-Morgante AM. The clinical impact of chromosomal rearrangements with breakpoints upstream of the SOX9 gene: two novel de novo balanced translocations associated with acampomelic campomelic dysplasia. *BMC Med Genet [Internet].* 2013;14. Available from: <http://dx.doi.org/10.1186/1471-2350-14-50>
13. Velagaleti GVN, Bien-Willner GA, Northup JK, Lockhart LH, Hawkins JC, Jalal SM, et al. Position effects due to chromosome breakpoints that map approximately 900 Kb upstream and approximately 1.3 Mb downstream of SOX9 in two patients with campomelic dysplasia. *Am J Hum Genet.* 2005;76:652–62.
14. Refai O, Friedman A, Terry L, Jewett T, Pearlman A, Perle MA, et al. De novo 12;17 translocation upstream of SOX9 resulting in 46,XX testicular disorder of sex development. *Am J Med Genet A.* 2010;152A:422–6.
15. Hill-Harfe KL, Kaplan L, Stalker HJ, Zori RT, Pop R, Scherer G, et al. Fine mapping of chromosome 17 translocation breakpoints > or = 900 Kb upstream of SOX9 in acampomelic campomelic dysplasia and a mild, familial skeletal dysplasia. *Am J Hum Genet.* 2005;76:663–71.
16. Redin C, Brand H, Collins RL, Kammin T, Mitchell E, Hodge JC, et al. The genomic landscape of balanced cytogenetic abnormalities associated with human congenital anomalies. *Nat Genet.* 2017;49:36–45.
17. Cotney J, Leng J, Yin J, Reilly SK, DeMare LE, Emera D, et al. The evolution of lineage-specific regulatory activities in the human embryonic limb. *Cell.* 2013;154:185–96.
18. Monti R, Barozzi I, Osterwalder M, Lee E, Kato M, Garvin TH, et al. Limb-Enhancer Genie: An accessible resource of accurate enhancer predictions in the developing limb. *PLoS Comput Biol.* 2017;13:e1005720.
